# Supplementary material
Source: publisher site journal article supplement (https://www.dovepress.com/article/561047)

**Supplementary Table 1. Summary of Two Parts of Questionnaire Related to This Study.**

**Supplementary Table 2. Factors Associated with Depression, anxiety, and sleep disturbance Included in the Regression Model.**

**Supplementary Table 3. Secondary Predictive Models for Analyzing Influencing Factors of Depression, Anxiety, and Sleep Disturbance**

**Supplementary Table 4. Variance Inflation Factors (VIF) for Variables**

**Supplementary Table 5. Sensitivity Analyses for Depression and Anxiety Based on Cut-off Score ≥10**

**Supplementary Table 6. Univariate logistic regression analysis to identify factors associated with in pain patients.**

**Supplementary Table 7. Details of missing data by variable**

**Supplementary Table 8. Details of missing data by group**

**Supplementary Table 9. Distributions of PHQ- 9, GAD-7, PSQI, BPI Interference Scores and Neuroticism Levels**

**Supplementary Table 10.** **Complete-case sensitivity analyses for Analyzing Influencing Factors of Depression, Anxiety, and Sleep Disturbance**

**Supplementary Table 11. The subgroup of pain location in anxiety**

**Supplementary table 12. Ethics committees**

**Supplementary table 13. Goodness-of-Fit Indices of Logistic Regression Models for Depression, Anxiety, and Sleep Disturbance**

**Supplementary Table 14. Incorporation of subgroup analysis by study center**

**Supplementary Table 15. Characteristics and self-reported outcomes of patients with chronic pain by site**

**Supplemental Figure 1. Convergence checks**

| **Supplementary Table 1. Summary of Two Parts of the Questionnaire Related to This Study Questions** | | |
| --- | --- | --- |
| **Questions** | **Types** | **Choices** |
| **Part One: Demographic information** | | |
| Please select your gender: | Single choice | Male/Female |
| Please fill in your age (years) | Blank | / |
| Please fill in your height (cm) | Blank | / |
| Please fill in your weight (kg) | Blank | / |
| Please select your highest level of education: | Single choice | Elementary school or below/Junior high school/Senior high |
| “In general, would you say your health is?” | Single choice | Excellent, very good, good, fair or poor |
| Physical activity level: Can you get more than 30 minutes of exercise three times a week (brisk walking, biking, high-definition housework)? | Single choice | Yes/No |
| Do you have the habit of smoking? | Single choice | Yes/No |
| Do you have the habit of drinking alcohol? | Single choice | Yes/No |
| Is your sick leave due to pain? | Single choice | Yes/No |
| ﻿How long have you been chronic pain? (years) | Blank | / |
| Do you have used pain medicine? | Single choice | Yes/No |
| Please fill in your pain location | ﻿Multiple choice | Neck, low back, knee |
| Pain pressure threshold was measured three times at the left lateral epicondyle of the humerus. (requiring the patient to turn his or her head to the right side and face away from the limb being evaluated). | Blank | / |
| **Part Two: self-report questions** | | |
| Depression symptoms | Patient Health Questionnaire-9 (PHQ-9) | Score range, 0-21; over the 14 days prior to assessment. |
| Generalized anxiety symptoms | Generalized Anxiety Disorder-7 (GAD-7) | Score range, 0-21; over the 14 days prior to assessment. |
| Sleep disturbance | Pittsburgh Sleep Quality Index (PSQI) | Over the 30 days prior to assessment. |
| Pain intensity | Numerical rating scale (NRS) | Range, 0-10 outcomes; over the 7 days prior to assessment. |
| Pain interference | Brief Pain Inventory (BPI)Pain Interference subscale | Range, 0-10 outcomes; higher scores; over the 1 days prior to assessment. |
| Human personality | Neuroticism Extraversion Openness Five-Factor Inventory (NEO-FFI) | 60-item version implementing the extensively empirically validated 5-factor model of human personality. |

| **Supplementary Table 2. Factors Associated with Depression, anxiety, and sleep disturbance Included in the Regression Model** | | | | |
| --- | --- | --- | --- | --- |
| **Factors** | **Definitions** | **Types of variables** | **Reference category** | **Summarizing forms** |
| Gender | In the following 2 categories:  1. male;  2.female | Categorical | Male | Odds ratio with a 95% confidence interval |
| Age (years) | ≥ 18 | Continuous | / | Odds ratio with a 95% confidence interval |
| BMI | Weight (kg)/height (cm) 2 kg/m2 | Continuous | / | Odds ratio with a 95% confidence interval |
| Level of education | In the following 4 categories:  1.High school less  2.High school  3.Bachelor’s degree  4. Graduate degree | Categorical | High school less | Odds ratio with a 95% confidence interval |
| Self-rated health | In the following 2 categories: 1. Good = “excellent” or “very good” or “good” self-rated health; 2. Poor = “fair” or “poor” self-rated health; | Categorical | Good | Odds ratio with a 95% confidence interval |
| Physical activity level(3times/week) | 1. Yes  2. No | Categorical | Yes | Odds ratio with a 95% confidence interval |
| Smoking | 1.No  2.Yes | Categorical | No | Odds ratio with a 95% confidence interval |
| Drinking alcohol | 1.No  2.Yes | Categorical | No | Odds ratio with a 95% confidence interval |
| Sick leave due to pain | 1.No  2.Yes | Categorical | No | Odds ratio with a 95% confidence interval |
| Pain duration (years) | **/** | Continuous | **/** | Odds ratio with a 95% confidence interval |
| Pain medicine | 1.No  2.Yes | Categorical | No | Odds ratio with a 95%  confidence interval |
| Neck pain | 1.No  2.Yes | Categorical | No | Odds ratio with a 95% confidence interval |
| Low back pain | 1.No  2.Yes | Categorical | No | Odds ratio with a 95%  confidence interval |
| Knee pain | 1.No  2.Yes | Categorical | No | Odds ratio with a 95% confidence interval |
| Depression symptoms | Scores | Continuous | **/** | Odds ratio with a 95% confidence interval |
| Generalized anxiety symptoms | Scores | Continuous | **/** | Odds ratio with a 95%  confidence interval |
| Sleep disturbances | Scores | Continuous | **/** | Odds ratio with a 95% confidence interval |
| Pain intensity | Scores | Continuous | **/** | Odds ratio with a 95%  confidence interval |
| Pain interference | Scores | Continuous | **/** | Odds ratio with a 95% confidence interval |
| Human personality | Scores | Continuous | **/** | Odds ratio with a 95%  confidence interval |

**References:**

1. Sá KN, Baptista AF, Matos MA, Lessa Í. Chronic pain and gender in Salvador population. *Brazil. Pain.* 2008;139(3):498-506.

2. García-Esquinas E, Rodríguez-Sánchez I, Ortolá R, Lopez-Garcia E, Caballero FF, Rodríguez-Mañas L, Banegas JR, Rodríguez-Artalejo F. Gender Differences in Pain Risk in Old Age: Magnitude and Contributors. Mayo Clin Proc. 2019;94(9):1707-1717.

3. De La Rosa JS, Brady BR, Ibrahim MM, Herder KE, Wallace JS, Padilla AR, Vanderah TW. Co-occurrence of chronic pain and anxiety/depression symptoms in U.S. adults: prevalence, functional impacts, and opportunities. Pain. 2024;165(3):666-673.

4. Xu M, Yin X, Gong Y. Lifestyle Factors in the Association of Shift Work and Depression and Anxiety. JAMA Netw Open. 2023;6(8):e2328798.

5. Hani Abdullah UE, Kelly S, Ricker A, Nabage M, Khazen O, Telkes I, DiMarzio M, Wilson C, Pilitsis JG. Perceptions of pain in aging females undergoing spinal cord stimulation. Pain Manag. 2023;13(12):701-708.

6. Vitkova M, Gdovinova Z, Rosenberger J, Szilasiova J, Nagyová I, Mikula P, Krokavcova M, Groothoff JW, van Dijk JP. Factors associated with poor sleep quality in patients with multiple sclerosis differ by disease duration. Disabil Health J. 2014;7(4):466-71.

7. Cleeland CS, Ryan KM. Pain assessment: global use of the Brief Pain Inventory. Ann Acad Med Singapore. 1994;23(2):129-138.

8. Davies KA, Macfarlane GJ, Nicholl BI, et al. Restorative sleep predicts the resolution of chronic widespread pain: results from the EPIFUND study. Rheumatology (Oxford). 2008;47(12):1809-1813.

9. Lyckegård Finn E, Parinder A, Nyman E, Dahlin LB. Complex Regional Pain Syndrome: a cross-sectional study of physical symptoms, disability, and psychological health in long term. Pain Rep. 2024; 9(5):e1180.

| **Supplementary Table 3. Secondary Predictive Models for Analyzing Influencing Factors of Depression, Anxiety, and Sleep Disturbance** | | | |
| --- | --- | --- | --- |
| Measure | **Secondary model 1** | **Secondary model 2** | **Secondary model 3** |
|  | OR (95% CI) | OR (95% CI) | OR (95% CI) |
| Age | 0.99(0.98-1.00) | 0.99 (0.98-1.01) | 1.01 (0.99-1.02) |
| Sex |  |  |  |
| Male | 1.00 [reference] | 1.00 [reference] | 1.00 [reference] |
| Female | 1.03 (0.74-1.45) | 1.42 (0.92-2.18) | 1.28 (0.94-1.74) |
| BMI | 0.96 (0.92-1.01) | 0.99 (0.93-1.05) | 0.99 (0.95-1.03) |
| Education |  |  |  |
| High school less | 1.00 [reference] | 1.00 [reference] | 1.00 [reference] |
| High school | 1.16 (0.67-1.99) | 0.58 (0.28-1.18) | 1.00 (0.61-1.66) |
| Bachelor’s degree | 0.76 (0.47-1.24) | 0.72 (0.40-1.32) | 0.94 (0.60-1.47) |
| Graduate degree | 0.66 (0.36-1.21) | 0.46 (0.21-1.01) | 0.90 (0.52-1.57) |
| Pain duration | 0.98 (0.95-1.01) | 1.00 (0.96-1.04) | 0.99 (0.97-1.02) |
| Pain intensity (NRS) | 0.96 (0.86-1.06) | 0.86 (0.75-0.99) | 0.95 (0.86-1.04) |
| Alcohol |  |  |  |
| No | 1.00 [reference] | 1.00 [reference] | 1.00 [reference] |
| Yes | 1.22 (0.86-1.74) | 1.63 (1.05-2.54) a | 1.68 (1.21-2.32) a |
| Pain medicine use |  |  |  |
| No | 1.00 [reference] | 1.00 [reference] | 1.00 [reference] |
| Yes | 1.69 (0.96-2.98) | 0.75 (0.37-1.55) | 1.24 (0.73-2.11) |
| Pain interference (BPI) | 1.32 (1.21-1.43) a | 1.54 (1.39-1.71) a | 1.29 (1.19-1.40) a |
| Self-rated health |  |  |  |
| Good | 1.00 [reference] | 1.00 [reference] | 1.00 [reference] |
| Poor | 1.89 (1.40-2.54) a | 1.44 (0.97-2.13) | 1.13 (0.86-1.48) |
| Sick leave due to pain |  |  |  |
| No | 1.00 [reference] | 1.00 [reference] | 1.00 [reference] |
| Yes | 1.31 (0.94-1.97) | 0.84 (0.55-1.26) | 1.22 (0.90-1.65) |
| Human personality (NEO-FFI) |  |  |  |
| Neuroticism | 1.11 (1.08-1.14) a | 1.15(1.11-1.19) a | 1.05(1.03-1.08) a |
| Extraversion | 0.97 (0.94-1.00) | 0.99 (0.95-1.02) | 0.94 (0.92-0.97) a |
| Agreeableness | 1.03 (1.00-1.07) a | 1.00 (0.96-1.03) a | 1.03 (1.00-1.06) |
| Conscientiousness | 1.00 (0.97-1.03) | 1.04 (1.01-1.08) | 1.02 (0.99-1.06) |
| Openness | 1.02 (0.99-1.05) | 1.04 (1.01-1.08) | 0.99 (0.96-1.02) |
| Neck pain |  |  |  |
| No | 1.00 [reference] | 1.00 [reference] | 1.00 [reference] |
| Yes | 1.36(0.94-1.97) | 2.60(1.63-4.14) a | 1.20(0.86-1.67) a |
| Low back pain |  |  |  |
| No | 1.00 [reference] | 1.00 [reference] | 1.00 [reference] |
| Yes | 1.14 (0.79-1.63) | 1.59 (1.01-2.49) | 1.32 (0.95-1.84) |

CI, confidence interval; OR, odds ratio; BMI: body mass index; PPT, pain pressure threshold; NRS: numerical rating scale; BPI: Brief Pain Inventory. PHQ-9, Patient Health Questionnaire-9; GAD-7, Generalized Anxiety Disorder Scale-7; PSQI, Pittsburgh Sleep Quality Index; NEO-FFI, Neuroticism Extraversion Openness Five-Factor Inventory. a *P* < 0.050. Secondary model 1 (Depression), predictive model for analyzing the influencing factors of depression, the predictor set does not include anxiety or sleep disturbance; Secondary model 2 (Anxiety), predictive model for analyzing the influencing factors of anxiety, the predictor set does not include depression or sleep disturbance; Secondary model 3 (Sleep disturbance), predictive model for analyzing the influencing factors of sleep disturbance, the predictor set does not include anxiety or depression.

**Supplemental Table 4. Variance Inflation Factors (VIF) for Variables**

| Measure | **VIF** |
| --- | --- |
| Age | 2.76 |
| Sex | 2.95 |
| BMI | 1.04 |
| Education | 1.11 |
| Pain duration | 1.11 |
| Pain intensity (NRS) | 1.20 |
| Alcohol | 1.22 |
| Pain medicine use | 1.11 |
| Pain interference (BPI) | 1.04 |
| Self-rated health | 1.22 |
| Sick leave due to pain | 1.37 |
| Depression (PHQ-9) | 1.11 |
| Anxiety (GAD-7) | 1.07 |
| Sleep (PISQ) | 1.25 |
| Human personality (NEO-FFI) |  |
| Neuroticism | 1.77 |
| Extraversion | 1.50 |
| Agreeableness | 2.20 |
| Conscientiousness | 1.63 |
| Openness | 1.94 |
| Neck pain | 2.81 |
| Low back pain | 2.01 |

BMI: body mass index; PPT, pain pressure threshold; NRS: numerical rating scale; BPI: Brief Pain Inventory. PHQ-9, Patient Health Questionnaire-9; GAD-7, Generalized Anxiety Disorder Scale-7; PSQI, Pittsburgh Sleep Quality Index; NEO-FFI, Neuroticism Extraversion Openness Five-Factor Inventory. VIF, Variance Inflation Factor. The criterion for collinearity diagnostics is a VIF ≥ 5, the collinearity among variables in this study was extremely weak.

| **Supplementary Table 5. Sensitivity Analyses for Depression and Anxiety Based on Cut-off Score ≥10** | | | | | |
| --- | --- | --- | --- | --- | --- |
| Measure |  | **Depression** | | **Anxiety** | |
|  | OR (95% CI) | |  | | OR (95% CI) |
| Age | 0.97(0.94-1.00) | |  | | 1.01 (0.97-1.04) |
| Sex |  | |  | |  |
| Male | 1.00 [reference] | |  | | 1.00 [reference] |
| Female | 0.76 (0.36-1.60) | |  | | 2.42 (0.95-6.19) |
| BMI | 1.05 (0.94-1.16) | |  | | 1.04 (0.92-1.17) |
| Education |  | |  | |  |
| High school less | 1.00 [reference] | |  | | 1.00 [reference] |
| High school | 0.57 (0.68-2.52) | |  | | 0.30 (0.06-1.47) |
| Bachelor’s degree | 1.81 (0.54-6.08) | |  | | 0.54 (0.15-1.90) |
| Graduate degree | 1.57 (0.38-6.44) | |  | | 0.52 (0.11-2.56) |
| Pain duration | 0.96 (0.88-1.04) | |  | | 1.06 (0.99-1.13) |
| Pain intensity (NRS) | 0.84 (0.65-1.08) | |  | | 0.79 (0.58-1.08) |
| Alcohol |  | |  | |  |
| No | 1.00 [reference] | |  | | 1.00 [reference] |
| Yes | 0.52 (0.23-1.16) | |  | | 1.43 (0.57-3.60) |
| Pain medicine use |  | |  | |  |
| No | 1.00 [reference] | |  | | 1.00 [reference] |
| Yes | 2.15 (0.76-6.06) | |  | | 1.19 (0.32-4.41) |
| Pain interference (BPI) | 1.05 (0.86-1.27) | |  | | 1.33 (1.06-1.67) a |
| Self-rated health |  | |  | |  |
| Good | 1.00 [reference] | |  | | 1.00 [reference] |
| Poor | 3.39 (1.47-7.85) a | |  | | 0.75 (0.30-1.89) |
| Sick leave due to pain |  | |  | |  |
| No | 1.00 [reference] | |  | | 1.00 [reference] |
| Yes | 1.05 (0.53-2.09) | |  | | 1.27 (0.56-2.86) |
| Depression (PHQ-9) | NA | |  | | 1.40(1.25-1.57) a |
| Anxiety (GAD-7) | 1.41(1.28-1.57) a | |  | | NA |
| Sleep (PISQ) | 1.33(1.18-1.49) a | |  | | 1.21 (1.07-1.37) a |
| Human personality (NEO-FFI) |  | |  | |  |
| Neuroticism | 1.07 (1.01-1.13) a | |  | | 1.10(1.03-1.18) a |
| Extraversion | 0.95 (0.89-1.01) | |  | | 1.08 (1.00-1.16) |
| Agreeableness | 0.96 (0.89-1.02) | |  | | 1.09 (1.01-1.18) a |
| Conscientiousness | 1.02 (0.96-1.08) | |  | | 0.97 (0.91-1.05) |
| Openness | 1.01 (0.95-1.07) | |  | | 1.03 (0.96-1.11) |
| Neck pain |  | |  | |  |
| No | 1.00 [reference] | |  | | 1.00 [reference] |
| Yes | 1.09(0.47-2.52) | |  | | 4.07(1.51-11.0) a |
| Low back pain |  | |  | |  |
| No | 1.00 [reference] | |  | | 1.00 [reference] |
| Yes | 1.07 (0.47-2.44) | |  | | 1.65 (0.66-4.12) |

CI, confidence interval; OR, odds ratio; NA, not applicable; BMI: body mass index; PPT, pain pressure threshold; NRS: numerical rating scale; BPI: Brief Pain Inventory. PHQ-9, Patient Health Questionnaire-9; GAD-7, Generalized Anxiety Disorder Scale-7; PSQI, Pittsburgh Sleep Quality Index; NEO-FFI, Neuroticism Extraversion Openness Five-Factor Inventory. a *P* < 0.050. Depression was defined using the PHQ-9 cutoff of 10 or higher; anxiety was defined using the GAD-7 cutoff of 10 or higher.

**Supplementary Table 6. Univariate logistic regression analysis to identify factors associated with depression, anxiety, and sleep disturbance in pain patients.**

| Measure | **Depression** | | **Anxiety** | | **Sleep disturbance** | |
| --- | --- | --- | --- | --- | --- | --- |
|  | Univariate |  | Univariate |  | Univariate |  |
|  | OR (95% CI) | p-value | OR (95% CI) | p-value | OR (95% CI) | p-value |
| Age | 0.99(0.98-1.00) | .046 | 0.99(0.98-1.00) * | .065 | 1.01(1.00-1.01) | .208 |
| Sex (being female) | 1.25(0.97-1.62) | .088 | 1.41(1.02-1.95) * | .037 | 1.22(0.95-1.56) | .113 |
| BMI | 0.95(0.92-0.99) | .020 | 0.97(0.92-1.01) | .150 | 0.99(0.96-1.03) | .747 |
| Education |  |  |  |  |  |  |
| High school less | 1[reference] | NA | 1[reference] | NA | 1[reference] | NA |
| High school | 1.27(0.79-2.05) | .319 | 0.89(0.48-1.64) | .715 | 1.06(0.67-1.68) | .814 |
| Bachelor’s degree | 1.06(0.73-1.55) | .750 | 1.19(0.75-1.90) | .466 | 0.87(0.60-1.25) | .441 |
| Graduate degree | 0.86(0.55-1.35) | .521 | 0.85(0.49;1.50) | .582 | 0.72(0.47-1.11) | .135 |
| Pain duration | 0.99(0.97-1.02) | .643 | 1.02(0.99-1.05) | .161 | 1.01(0.99-1.03) | .368 |
| Pain intensity (NRS) | 1.12[1.03-1.22) * | .011 | 1.08(0.97-1.20) | .143 | 1.08(0.99-1.17) | .069 |
| Smoking(yes) | 1.26(0.83-1.93) | .280 | 1.29(0.78-2.14) | .315 | 1.29(0.85-1.96) | .239 |
| Alcohol(yes) | 0.99(0.76-1.31) | .965 | 1.17(0.84-1.62) | .349 | 1.21(0.93-1.58) | .149 |
| Exercises ≥3/week(yes) | 0.90(0.71-1.16) | .417 | 0.86(0.63-1.16) | .315 | 0.90(0.71-1.15) | .406 |
| Pain medicine use(yes) | 1.70(1.06-2.74) * | .027 | 1.09(0.60-1.95) | .784 | 1.39(0.87-2.24) | .17 |
| PPT | 1.00(0.99-1.01) | .747 | 0.99(0.98-1.01) | .277 | 1.00(0.99-1.01) | .832 |
| Pain interference (BPI) | 0.97(0.81-1.15) | < .001 | 1.54(1.41-1.68) * | < .001 | 1.35(1.26-1.44) * | < .001 |
| Self-rated health (being poor) | 2.67(2.05-3.48) * | < .001 | 2.42(1.72-3.39) * | < .001 | 1.63(1.28-2.08) * | < .001 |
| Sick leave due to pain(yes) | 1.62(1.23-2.14) * | < .001 | 1.21(0.86-1.70) | .274 | 1.42(1.08-1.87) * | .012 |
| Depression (PHQ-9) | NA | NA | 1.57(1.48-1.68) * | < .001 | 1.39(1.32-1.46) * | < .001 |
| Anxiety (GAD-7) | 1.69(1.58-1.81) * | < .001 | NA | NA | 1.33(1.27-1.40) * | < .001 |
| Sleep (PISQ) | 1.46(1.38-1.54) * | < .001 | 1.31(1.25-1.38) * | < .001 | NA | NA |
| Human personality |  |  |  |  |  |  |
| Neuroticism | 1.13(1.11-1.15) * | < .001 | 1.16(1.13-1.19) * | < .001 | 1.07(1.05-1.09) * | < .001 |
| Extraversion | 0.92(0.90-0.94) * | < .001 | 0.93(0.91-0.96) * | < .001 | 0.92(0.90-0.94) * | < .001 |
| Agreeableness | 0.97(0.94-0.99) * | .004 | 0.94(0.91-0.97) * | < .001 | 0.99(0.97-1.01) | .437 |
| Conscientiousness | 0.94(0.92-0.96) * | < .001 | 0.96(0.94-0.98) * | < .001 | 0.97(0.95-0.99) * | .001 |
| Openness | 0.99(0.97-1.01) | .722 | 1.01(0.98-1.04) | .49 | 0.97(0.94-0.99) * | .002 |
| Neck pain | 1.40(1.09-1.79) | .008 | 1.91(1.39-2.63) * | < .001 | 1.08(0.85-1.37) | .514 |
| Low back pain | 0.99(0.77-1.26) | .908 | 1.00(0.74-1.35) | .991 | 1.25(0.99-1.58) | .065 |
| Knee pain | 0.80(0.54-1.18) | .256 | 0.82(0.50-1.34) | .417 | 0.99(0.68-1.43) | .952 |

**P* < 0.050. CI, confidence interval; OR, odds ratio; NA, not applicable; BMI: body mass index; PPT, pain pressure threshold; NRS: numerical rating scale; BPI: Brief Pain Inventory. PHQ-9, Patient Health Questionnaire-9; GAD-7, Generalized Anxiety Disorder Scale-7; PSQI, Pittsburgh Sleep Quality Index.

**Supplemental Table 7. Details of missing data by variable**

| **Variables** | **Count** | **Missing（%）** |
| --- | --- | --- |
| Age | 1107 | 0 |
| Sex | 1107 | 0 |
| ﻿﻿BMI, kg/m2 | 1107 | 0 |
| Education | 1107 | 0 |
| Exercise (≥3 times/week) | 1106 | 1（0.09） |
| Alcohol | 1106 | 1（0.09） |
| Sick leave due to pain | 1105 | 2（0.18） |
| Pain duration | 1105 | 2（0.18） |
| PPT | 1105 | 2（0.18） |
| Pain intensity: mean (SD) | 1107 | 0 |
| Pain diagnoses |  |  |
| Neck pain | 1107 | 0 |
| Low back pain | 1107 | 0 |
| Knee pain | 1107 | 0 |
| Pain medicine use | 1107 | 0 |
| Pain interference (BPI) | 1106 | 1（0.09） |
| Self-rated health | 1107 | 0 |
| Human personality (NEO-FFI) |  |  |
| Neuroticism | 1096 | 11（0.99） |
| Extraversion | 1099 | 8（0.72） |
| Agreeableness | 1090 | 17（1.54） |
| Conscientiousness | 1091 | 16（0.99） |
| Openness | 1088 | 18（1.63） |

BMI: body mass index; PPT, pain pressure threshold; NRS: numerical rating scale; BPI: Brief Pain Inventory. PHQ-9, Patient Health Questionnaire-9; GAD-7, Generalized Anxiety Disorder Scale-7; PSQI, Pittsburgh Sleep Quality Index; NEO-FFI, Neuroticism Extraversion Openness Five-Factor Inventory.

**Supplemental Table 8. Details of missing data by group**

| **Variables** | **Depression**  Missing | **Anxiety**  Missing | **Sleep disturbance**  Missing |
| --- | --- | --- | --- |
| Age | 0 | 0 | 0 |
| Sex | 0 | 0 | 0 |
| ﻿﻿BMI, kg/m2 | 0 | 0 | 0 |
| Education | 0 | 0 | 0 |
| Exercise (≥3 times/week) | 0 | 0 | 0 |
| Alcohol | 1 | 0 | 0 |
| Sick leave due to pain | 0 | 0 | 0 |
| Pain duration | 0 | 0 | 0 |
| PPT | 1 | 0 | 0 |
| Pain intensity: mean (SD) | 0 | 0 | 0 |
| Pain diagnoses |  |  |  |
| Neck pain | 0 | 0 | 0 |
| Low back pain | 0 | 0 | 0 |
| Knee pain | 0 | 0 | 0 |
| Pain medicine use | 0 | 0 | 0 |
| Pain interference (BPI) | 0 | 0 | 0 |
| Self-rated health | 0 | 0 | 0 |
| Human personality (NEO-FFI) |  |  |  |
| Neuroticism | 6 | 3 | 5 |
| Extraversion | 5 | 2 | 4 |
| Agreeableness | 7 | 3 | 9 |
| Conscientiousness | 3 | 2 | 6 |
| Openness | 6 | 1 | 7 |

BMI: body mass index; PPT, pain pressure threshold; NRS: numerical rating scale; BPI: Brief Pain Inventory. PHQ-9, Patient Health Questionnaire-9; GAD-7, Generalized Anxiety Disorder Scale-7; PSQI, Pittsburgh Sleep Quality Index; NEO-FFI, Neuroticism Extraversion Openness Five-Factor Inventory.

**Supplemental Table 9. Distributions of PHQ-9, GAD-7, PSQI, BPI Interference Scores and Neuroticism Levels**

| **Variable** | **Mean** | **Standard Deviation** | **Minimum** | **25% Percentile** | **50% Percentile** | **75% Percentile** | **Maximum** |
| --- | --- | --- | --- | --- | --- | --- | --- |
| PHQ-9 | 4.26 | 3.66 | 0.00 | 2.00 | 4.00 | 6.00 | 26.00 |
| GAD-7 | 3.12 | 3.30 | 0.00 | 1.00 | 2.00 | 4.00 | 21.00 |
| PSQI | 5.67 | 3.22 | 0.00 | 3.00 | 5.00 | 8.00 | 19.00 |
| BPI | 3.08 | 1.86 | 0.00 | 1.70 | 2.90 | 4.30 | 9.00 |
| Neuroticism | 31.22 | 7.06 | 12.00 | 26.00 | 32.00 | 36.00 | 59.00 |

BPI: Brief Pain Inventory. PHQ-9, Patient Health Questionnaire-9; GAD-7, Generalized Anxiety Disorder Scale-7; PSQI, Pittsburgh Sleep Quality Index.

| **Supplementary Table 10.** **Complete-case sensitivity analyses for Analyzing Influencing Factors of Depression, Anxiety, and Sleep Disturbance** | | | |
| --- | --- | --- | --- |
| **Variable** | **Depression** | **Anxiety** | **Sleep disturbance** |
|  | OR (95% CI) | OR (95% CI) | OR (95% CI) |
| Age | 0.99(0.98-1.01) | 1.00 (0.98-1.02) | 1.01 (1.00-1.02) |
| Sex |  |  |  |
| Male | 1.00 [reference] | 1.00 [reference] | 1.00 [reference] |
| Female | 1.05 (0.75-1.48) | 1.55 (0.95-2.52) | 1.22 (0.87-1.70) |
| BMI | 0.96 (0.92-1.01) | 0.99 (0.92-1.06) | 0.99 (0.94-1.04) |
| Education |  |  |  |
| High school less | 1.00 [reference] | 1.00 [reference] | 1.00 [reference] |
| High school | 1.25 (0.72-2.18) | 0.60 (0.27-1.34) | 1.06 (0.61-1.85) |
| Bachelor’s degree | 0.78 (0.47-1.28) | 0.69 (0.34-1.40) | 1.10 (0.67-1.80) |
| Graduate degree | 0.74 (0.40-1.38) | 0.39 (0.16-0.98) | 1.11 (0.60-2.05) |
| Pain duration | 0.97 (0.94-1.01) | 1.01 (0.97-1.06) | 1.01 (0.98-1.04) |
| Pain intensity (NRS) | 0.96 (0.87-1.07) | 0.88 (0.75-1.03) | 0.96 (0.87-1.07) |
| Alcohol |  |  |  |
| No | 1.00 [reference] | 1.00 [reference] | 1.00 [reference] |
| Yes | 1.27 (0.89-1.82) | 1.82 (1.11-2.99) a | 1.62 (1.13-2.30) a |
| Pain medicine use |  |  |  |
| No | 1.00 [reference] | 1.00 [reference] | 1.00 [reference] |
| Yes | 1.80 (1.00-3.20) | 0.64 (0.27-1.51) | 0.99 (0.56-1.76) |
| Pain interference (BPI) | 1.32(1.21-1.44) a | 1.35 (1.19-1.53) a | 1.13 (1.03-1.24) a |
| Self-rated health |  |  |  |
| Good | 1.00 [reference] | 1.00 [reference] | 1.00 [reference] |
| Poor | 1.80 (1.33-2.45) a | 0.96 (0.61-1.49) | 0.94 (0.70-1.26) |
| Sick leave due to pain |  |  |  |
| No | 1.00 [reference] | 1.00 [reference] | 1.00 [reference] |
| Yes | 1.25 (0.90-1.75) | 0.71 (0.44-1.13) | 1.06 (0.76-1.49) |
| Human personality (NEO-FFI) |  |  |  |
| Neuroticism | 1.11 (1.08-1.14) a | 1.09(1.05-1.14) a | 1.01(0.98-1.04) |
| Extraversion | 0.98 (0.95-1.00) | 1.03 (0.99-1.07) | 0.95 (0.92-0.98) a |
| Agreeableness | 1.03 (1.00-1.06) | 0.99 (0.95-1.04) | 1.03 (1.00-1.06) |
| Conscientiousness | 1.00 (0.97-1.03) | 1.04 (1.00-1.09) | 1.02 (0.99-1.06) |
| Openness | 1.02 (0.99-1.06) | 1.03 (0.99-1.08) | 0.98 (0.95-1.01) |
| Neck pain |  |  |  |
| No | 1.00 [reference] | 1.00 [reference] | 1.00 [reference] |
| Yes | 1.29(0.88-1.89) | 2.46(1.43-4.23) a | 1.08(0.74-1.57) |
| Low back pain |  |  |  |
| No | 1.00 [reference] | 1.00 [reference] | 1.00 [reference] |
| Yes | 1.05 (0.72-1.52) | 1.39 (0.82-2.49) | 1.46 (1.00-2.11) |

CI, confidence interval; OR, odds ratio; NA, not applicable; BMI: body mass index; PPT, pain pressure threshold; NRS: numerical rating scale; BPI: Brief Pain Inventory. PHQ-9, Patient Health Questionnaire-9; GAD-7, Generalized Anxiety Disorder Scale-7; PSQI, Pittsburgh Sleep Quality Index; NEO-FFI, Neuroticism Extraversion Openness Five-Factor Inventory.Depression was defined using the PHQ-9 cutoff of 5 or higher; anxiety was defined using the GAD-7 cutoff of 5 or higher; sleep disturbance was defined as a total PSQI score of > 5.

| **Supplementary Table 11. The subgroup of pain location in anxiety** | | | |
| --- | --- | --- | --- |
| **Variable** | **Neck** | **Low back** | **Knee** |
|  | OR (95% CI) | OR (95% CI) | OR (95% CI) |
| Age | 1.00(0.98-1.02) | 0.99 (0.97-1.01) | 0.93 (0.87-0.99) |
| Sex |  |  |  |
| Male | 1.00 [reference] | 1.00 [reference] | 1.00 [reference] |
| Female | 1.74 (0.99-3.07) | 1.13 (0.64-2.00) | 1.00 (0.16-6.38) |
| BMI | 1.02 (0.94-1.10) | 0.96 (0.89-1.04) | 0.97 (0.81-1.16) |
| Education |  |  |  |
| High school less | 1.00 [reference] | 1.00 [reference] | 1.00 [reference] |
| High school | 0.50 (0.20-1.28) | 1.20 (0.47-3.06) | 0.26 (0.03-2.63) |
| Bachelor’s degree | 0.73 (0.32-1.64) | 1.00 (0.43-2.31) | 0.15 (0.01-1.57) |
| Graduate degree | 0.50 (0.18-1.35) | 0.63 (0.22-1.82) | 0.00 (0.00-0.00) |
| Pain duration | 1.00 (0.96-1.05) | 1.02 (0.98-1.07) | 1.06 (0.93-1.20) |
| Pain intensity (NRS) | 0.78 (0.65-0.93) | 0.89 (0.74-1.08) | 1.02 (0.67-1.58) |
| Alcohol |  |  |  |
| No | 1.00 [reference] | 1.00 [reference] | 1.00 [reference] |
| Yes | 1.35 (0.76-2.37) | 1.42 (0.78-2.57) | 1.45 (0.23-9.12) |
| Pain medicine use |  |  |  |
| No | 1.00 [reference] | 1.00 [reference] | 1.00 [reference] |
| Yes | 0.88 (0.37-2.10) | 0.63 (0.24-1.66) | 2.14 (0.33-13.81) |
| Pain interference (BPI) | 1.53(1.34-1.75) a | 1.50 (1.29-1.74) a | 2.51 (1.56-4.05) a |
| Self-rated health |  |  |  |
| Good | 1.00 [reference] | 1.00 [reference] | 1.00 [reference] |
| Poor | 1.52 (1.93-2.50) a | 1.68 (0.95-2.95) | 0.75 (0.15-3.70) |
| Sick leave due to pain |  |  |  |
| No | 1.00 [reference] | 1.00 [reference] | 1.00 [reference] |
| Yes | 1.10 (0.66-1.83) | 0.68 (0.38-1.20) | 1.08 (0.26-4.45) |
| Human personality (NEO-FFI) |  |  |  |
| Neuroticism | 1.15 (1.10-1.20) a | 1.17(1.11-1.22) a | 1.14(0.98-1.31) |
| Extraversion | 0.99 (0.95-1.04) | 0.99 (0.94-1.04) | 1.05 (0.90-1.22) |
| Agreeableness | 1.01 (0.96-1.06) | 1.01 (0.96-1.07) | 1.06 (0.91-1.23) |
| Conscientiousness | 1.04 (0.99-1.09) | 1.06 (1.01-1.11) a | 1.07 (0.91-1.25) |
| Openness | 1.02 (0.98-1.07) | 1.04 (0.99-1.09) | 1.07 (0.93-1.24) |

BMI: body mass index; PPT, pain pressure threshold; NRS: numerical rating scale; BPI: Brief Pain Inventory. PHQ-9, Patient Health Questionnaire-9; GAD-7, Generalized Anxiety Disorder Scale-7; PSQI, Pittsburgh Sleep Quality Index; NEO-FFI, Neuroticism Extraversion Openness Five-Factor Inventory; anxiety was defined using the GAD-7 cutoff of 5 or higher.

| **Supplementary table 12. ethics committees** |
| --- |
| Medical Ethical Committee of Beijing University of Chinese Medicine |
| Medical Ethical Committee of The Third Affiliated Hospital of Changchun University of Chinese Medicine |
| Medical Ethical Committee of The Affiliated Hospital of Jiangxi University of Chinese Medicine |
| Medical Ethical Committee of Hubei Province Hospital of Traditional Chinese Medicine |
| Medical Ethical Committee of Shaanxi Province Hospital of traditional Chinese medicine |
| Medical Ethical Committee of Dongfang Hospital Affiliated to Beijing University of Chinese Medicine |
| Medical Ethical Committee of Shandong University Qilu Hospital High-tech zone hospital |
| Medical Ethical Committee of The First Hospital of Hunan University of Chinese Medicine |
| Medical Ethical Committee of Shanghai Municipal Hospital of Traditional Chinese Medicine, Shanghai University of Traditional Chinese Medicine |
| Medical Ethical Committee of The Second Affiliated Hospital of Anhui University of Chinese Medicine |
| Medical Ethical Committee of Jiangsu Province Hospital of Chinese Medicine |
| Medical Ethical Committee of Wangjing Hospital of China Academy of Chinese Medical Sciences |

**Supplementary Table 13. Goodness-of-Fit Indices of Logistic Regression Models for Depression, Anxiety, and Sleep Disturbance**

| **Measure** | **Depression** | **Anxiety** | **Sleep disturbance** |
| --- | --- | --- | --- |
| Null deviance | 1454.0 | 1078.4 | 1528.7 |
| Residual deviance | 1186.7 | 816.4 | 1363.1 |
| AIC | 1228.7 | 858.44. | 1405.1 |
| Likelihood ratio test | *P* < 0.001 | *P* < 0.001 | *P* < 0.001 |

AIC, akaike Information Criterion.

**Supplementary Table 14. Incorporation of subgroup analysis by study center**

| **Variable** | **Depression** | **Anxiety** | **Sleep disturbance** |
| --- | --- | --- | --- |
|  | OR (95% CI) | OR (95% CI) | OR (95% CI) |
| Age | 0.99 (0.98-1.01) | 0.99 (0.97-1.00) | 1.01 (1.00-1.02) |
| Sex |  |  |  |
| Male | 1.00 [reference] | 1.00 [reference] | 1.00 [reference] |
| Female | 1.31 (0.84-2.06) | 0.93 (0.66-1.33) | 1.15 (0.84-1.57) |
| BMI | 0.97 (0.91-1.03) | 0.94 (0.89-0.99) | 0.98 (0.93-1.02) |
| Education |  |  |  |
| High school less | 1.00 [reference] | 1.00 [reference] | 1.00 [reference] |
| High school | 1.25 (0.72-2.18) | 0.60 (0.27-1.34) | 1.06 (0.61-1.85) |
| Bachelor’s degree | 0.78 (0.47-1.28) | 0.69 (0.34-1.40) | 1.10 (0.67-1.80) |
| Graduate degree | 0.74 (0.40-1.38) | 0.39 (0.16-0.98) | 1.11 (0.60-2.05) |
| Pain duration | 0.97 (0.94-1.01) | 1.01 (0.97-1.06) | 1.01 (0.98-1.04) |
| Pain intensity (NRS) | 0.96 (0.87-1.07) | 0.88 (0.75-1.03) | 0.96 (0.87-1.07) |
| Alcohol |  |  |  |
| No | 1.00 [reference] | 1.00 [reference] | 1.00 [reference] |
| Yes | 1.43 (0.90-2.26) | 1.12 (0.77-1.61) | 1.54 (1.10-2.14) |
| Pain medicine use |  |  |  |
| No | 1.00 [reference] | 1.00 [reference] | 1.00 [reference] |
| Yes | 1.80 (1.01-3.20) | 0.64 (0.27-1.51) | 0.99 (0.56-1.76) |
| Pain interference (BPI) | 1.59 (1.42-1.78) | 1.38 (1.26-1.51) | 1.31 (1.20-1.42) |
| Self-rated health |  |  |  |
| Good | 1.00 [reference] | 1.00 [reference] | 1.00 [reference] |
| Poor | 1.52 (1.01-2.31) | 1.99 (1.45-2.74) | 1.18 (0.89-1.57) |
| Sick leave due to pain |  |  |  |
| No | 1.00 [reference] | 1.00 [reference] | 1.00 [reference] |
| Yes | 1.25 (0.90-1.75) | 0.71 (0.44-1.13) | 1.06 (0.76-1.49) |
| Human personality (NEO-FFI) |  |  |  |
| Neuroticism | 1.11 (1.08-1.14) | 1.09(1.05-1.14) a | 1.01(0.98-1.04) a |
| Extraversion | 0.98 (0.95-1.00) | 1.03 (0.99-1.07) | 0.95 (0.92-0.98) a |
| Agreeableness | 1.03 (1.00-1.06) | 0.99 (0.95-1.04) a | 1.03 (1.00-1.06) |
| Conscientiousness | 1.00 (0.97-1.03) | 1.04 (1.00-1.09) | 1.02 (0.99-1.06) |
| Openness | 1.02 (0.99-1.06) | 1.03 (0.99-1.08) | 0.98 (0.95-1.01) |
| Neck pain |  |  |  |
| No | 1.00 [reference] | 1.00 [reference] | 1.00 [reference] |
| Yes | 1.29(0.88-1.89) | 2.46(1.43-4.23) | 1.08(0.74-1.57) |
| Low back pain |  |  |  |
| No | 1.00 [reference] | 1.00 [reference] | 1.00 [reference] |
| Yes | 1.57 (0.99-2.50) | 1.10 (0.75-1.61) | 1.36 (0.97-1.91) |
| Center |  |  |  |
| 1 | 1 (Reference) | 1 (Reference) | 1 (Reference) |
| 2 | 0.52 (0.19-1.37) | 0.57 (0.27-1.18) | 0.79 (0.41-1.52) |
| 3 | 0.74 (0.23-2.33) | 0.92 (0.35-2.41) | 1.56 (0.65-3.72) |
| 4 | 0.00 (0.00-Inf) | 0.00 (0.00-Inf) | 0.67 (0.07-6.44) |
| 5 | 2.89 (1.32-6.31) | 2.13 (1.10-4.14) | 1.47 (0.79-2.76) |
| 6 | 3.54 (1.20-10.49) | 3.19 (1.35-7.53) | 3.08 (1.36-6.95) |
| 7 | 0.68 (0.31-1.49) | 0.90 (0.50-1.62) | 1.28 (0.74-2.21) |
| 8 | 1.34 (0.58-3.06) | 1.20 (0.63-2.31) | 2.57 (1.41-4.66) |
| 9 | 0.91 (0.42-1.98) | 1.21 (0.66-2.22) | 2.03 (1.17-3.54) |
| 10 | 0.75 (0.21-2.63) | 1.41 (0.61-3.24) | 1.75 (0.81-3.79) |
| 11 | 0.48 (0.20-1.19) | 0.29 (0.14-0.59) | 0.96 (0.52-1.80) |
| 12 | 1.44 (0.60-3.48) | 0.57 (0.27-1.20) | 1.96 (1.02-3.79) |
| 13 | 2.29 (0.97-5.38) | 1.62 (0.81-3.25) | 3.53 (1.82-6.85) |

CI, confidence interval; OR, odds ratio; NA, not applicable; BMI: body mass index; PPT, pain pressure threshold; NRS: numerical rating scale; BPI: Brief Pain Inventory. PHQ-9, Patient Health Questionnaire-9; GAD-7, Generalized Anxiety Disorder Scale-7; PSQI, Pittsburgh Sleep Quality Index; NEO-FFI, Neuroticism Extraversion Openness Five-Factor Inventory. a *P* < 0.050. Depression was defined using the PHQ-9 cutoff of 5 or higher; anxiety was defined using the GAD-7 cutoff of 5 or higher; sleep disturbance was defined as a total PSQI score of > 5.

**Supplementary Table 15. Characteristics and self-reported outcomes of patients with chronic pain by site**

**Center 1**

| **Measure** | **Total**  **(n=137)** | **Depression** | | |  | **Anxiety** | | |  | **Sleep disturbance** | | |
| --- | --- | --- | --- | --- | --- | --- | --- | --- | --- | --- | --- | --- |
| **Depression**  **(n=46)** | **Non-depression**  **(n=91)** | ***P*** |  | **Anxiety**  **(n=23)** | **Non-anxiety**  **(n=114)** | ***P*** |  | **Sleep disturbance**  **(n=58)** | **Normal sleep**  **(n=87)** | ***P*** |
| Age(y): mean (SD) | 51.01 (11.9) | 51.6 (9.8) | 50.7 (12.8) | .047 |  | 54.83 (8.6) | 50.24 (12.3) | 0.091 |  | 53.24 (11.6) | 49.72 (11.9) | 0.095 |
| Female: n (%) | 94 (68.6) | 34 (73.9) | 60 (65.9) | .083 |  | 18 (78.3) | 76 (66.7) | 0.397 |  | 35 (70.0) | 59 (67.8) | 0.941 |
| ﻿﻿BMI (kg/m2), mean (SD) | 23.97 (2.8) | 23.7 (3.0) | 24.1 (2.8) | .017 |  | 24.63 (2.7) | 23.84 (2.8) | 0.212 |  | 24.45 (3.0) | 23.70 (2.7) | 0.128 |
| Education: n (%) |  |  |  | .225 |  |  |  | 0.135 |  |  |  | 0.021 |
| High school less | 16 (11.7) | 6 (13.0) | 10 (11.0) |  |  | 5 (21.7) | 11 (9.6) |  |  | 9 (18.0) | 7 (8.0) |  |
| High school | 25 (18.2) | 12 (26.1) | 13 (14.3) |  |  | 6 (26.1) | 19 (16.7) |  |  | 14 (28.0) | 11 (12.6) |  |
| Bachelor’s degree | 88 (64.2) | 27 (58.7) | 61 (67.0) |  |  | 12 (52.2) | 76 (66.7) |  |  | 25 (50.0) | 63 (72.4) |  |
| Graduate degree | 8 (5.8) | 1 (2.2) | 7 (7.7) |  |  | 0 (0.0) | 8 (7.0) |  |  | 2 (4.0) | 6 (6.9) |  |
| Exercise (≥3/week): n (%) | 58 (42.3) | 27 (58.7) | 31 (34.1) | .010 |  | 14 (60.9) | 44 (38.6) | 0.082 |  | 27 (54.0) | 31 (35.6) | 0.052 |
| Smoking: n (%) | 10 (7.3) | 7 (15.2) | 3 (3.3) | .029 |  | 3 (13.0) | 7 (6.1) | 0.471 |  | 5 (10.0) | 5 (5.7) | 0.562 |
| Alcohol: n (%) | 27 (19.7) | 7 (15.2) | 20 (22.0) | .476 |  | 2 (8.7) | 25 (21.9) | 0.243 |  | 13 (26.0) | 14 (16.1) | 0.238 |
| Self ﻿rated health: n (%) |  |  |  | .016 |  |  |  | <0.001 |  |  |  | 1.000 |
| Good | 115 (83.9) | 44 (95.7) | 71 (78.0) |  |  | 23 (100.0) | 92 (80.7) |  |  | 42 (84.0) | 73 (83.9) |  |
| Pain duration (y): mean (SD) | 6.88 (7.07) | 6.8 (6.3) | 6.9 (7.5) | .899 |  | 8.56 (7.3) | 6.55 (7.0) | 0.214 |  | 6.93 (6.6) | 6.86 (7.4) | 0.955 |
| Sick leave due to pain: n (%) | 23 (16.8) | 14 (30.4) | 9 (9.9) | .005 |  | 6 (26.1) | 17 (14.9) | 0.316 |  | 11 (22.0) | 12 (13.8) | 0.317 |
| PPT(N): mean (SD) | 26.20 (6.7) | 26.7 (5.2) | 25.9 (7.3) | .527 |  | 27.70 (6.1) | 25.90 (6.8) | 0.238 |  | 26.95 (7.3) | 25.77 (6.3) | 0.321 |
| Pain medicine use: n (%) | 6 (4.4) | 1 (2.2) | 5 (5.5) | .649 |  | 0 (0.0) | 6 (5.3) | 0.571 |  | 1 (2.0) | 5 (5.7) | 0.550 |
| Pain intensity (NRS): mean (SD) | 5.85 (1.3) | 5.6 (1.1) | 5.9 (1.4) | .161 |  | 5.70 (1.3) | 5.88 (1.3) | 0.538 |  | 5.70 (1.2) | 5.93 (1.3) | 0.312 |
| Pain interference (BPI): mean (SD) | 2.63 (1.6) | 3.6 (1.7) | 2.2 (1.3) | <0.001 |  | 3.76 (1.8) | 2.40 (1.4) | <0.001 |  | 4.36 (1.7) | 2.21 (1.4) | <0.001 |
| Pain diagnoses: n (%) |  |  |  |  |  |  |  |  |  |  |  |  |
| Neck pain | 74 (54.0) | 29 (63.0) | 45 (49.5) | .185 |  | 16 (69.6) | 58 (50.9) | 0.158 |  | 30 (60.0) | 44 (50.6) | 0.375 |
| Low back pain | 77 (56.2) | 23 (50.0) | 54 (59.3) | .391 |  | 14 (60.9) | 63 (55.3) | 0.792 |  | 26 (52.0) | 51 (58.6) | 0.567 |
| Knee pain | 9 (6.6) | 4 (8.7) | 5 (5.5) | .727 |  | 1 (4.3) | 8 (7.0) | 0.992 |  | 1 (2.0) | 8 (9.2) | 0.201 |
| Depression (PHQ-9): mean (SD) | 3.58 (3.4) | 7.5 (2.4) | 1.5 (1.6) | < .001 |  | 8.35 (3.2) | 2.61 (2.6) | <0.001 |  | 5.70 (3.5) | 2.36 (2.8) | <0.001 |
| Anxiety (GAD-7): mean (SD) | 2.08 (3.3) | 3.1 (5.0) | 1.3 (1.9) | < .001 |  | 8.78 (3.4) | 1.40 (1.6) | <0.001 |  | 4.54 (4.3) | 1.55 (2.2) | <0.001 |
| Sleep (PISQ): mean (SD) | 5.64 (3.5) | 8.6 (3.0) | 3.6 (2.7) | < .001 |  | 9.57 (4.3) | 4.18 (3.0) | <0.001 |  | 9.26 (2.9) | 2.68 (1.5) | <0.001 |
| Human personality (NEO-FFI) mean (SD): |  |  |  |  |  |  |  |  |  |  |  |  |
| Extraversion | 61.28 (7.4) | 58.5 (4.5) | 62.6 (6.4) | <0.001 |  | 58.22 (6.8) | 61.90 (5.3) | 0.005 |  | 58.94 (6.2) | 62.93 (5.3) | <0.001 |
| Openness | 39.20 (4.0) | 38.5 (2.7) | 39.6 (4.5) | .125 |  | 37.96 (2.8) | 39.45 (4.2) | 0.104 |  | 38.62 (3.2) | 39.53 (4.4) | 0.203 |
| Conscientiousness | 42.58 (5.4) | 41.5 (5.1) | 42.8 (5.4) | .135 |  | 45.35 (6.5) | 45.63 (5.2) | 0.820 |  | 44.50 (5.9) | 46.21 (5.1) | 0.076 |
| Agreeableness | 40.51 (6.0) | 40.2 (5.1) | 40.5 (6.6) | .532 |  | 40.70 (6.4) | 40.59 (6.0) | 0.938 |  | 39.86 (5.4) | 41.03 (6.3) | 0.272 |
| Neuroticism | 32.83 (5.7) | 38.9 (6.0) | 30.6 (5.8) | <0.001 |  | 34.96 (6.3) | 31.44 (6.4) | 0.017 |  | 33.84 (5.2) | 30.69 (6.4) | 0.008 |

PPT, pain pressure threshold; BMI: body mass index. NRS: numerical rating scale. BPI: Brief Pain Inventory. PHQ-9, Patient Health Questionnaire-9; GAD-7, Generalized Anxiety Disorder Scale-7; PSQI, Pittsburgh Sleep Quality Index; NEO-FFI, Neuroticism Extraversion Openness Five-Factor Inventory. Differences between the depression, anxiety, and sleep disturbance and non- depression, anxiety, and sleep disturbance groups were examined by chi-square test for categorical variables and Student's t-test or Mann-Whitney test for continuous variables. Depression was defined using the PHQ-9 cutoff of 5 or higher; anxiety was defined using the GAD-7 cutoff of 5 or higher; sleep disturbance was defined as a total PSQI score of > 5.

**Center 2**

| **Measure** | **Total**  **(n=96)** | **Depression** | | |  | **Anxiety** | | |  | **Sleep disturbance** | | |
| --- | --- | --- | --- | --- | --- | --- | --- | --- | --- | --- | --- | --- |
| **Depression**  **(n=27)** | **Non-depression**  **(n=69)** | ***P*** |  | **Anxiety**  **(n=12)** | **Non-anxiety**  **(n=84)** | ***P*** |  | **Sleep disturbance**  **(n=34)** | **Normal sleep**  **(n=62)** | ***P*** |
| Age(y): mean (SD) | 40.89 (13.5) | 40.00 (13.4) | 41.23 (13.6) | 0.690 |  | 44.33 (12.9) | 40.39 (13.6) | 0.347 |  | 45.5 (13.2) | 38.3 (13.1) | 0.012 |
| Female: n (%) | 56 (58.3) | 12 (44.4) | 44 (63.8) | 0.135 |  | 6 (50.0) | 50 (59.5) | 0.754 |  | 20 (58.8) | 36 (58.1) | 1.000 |
| ﻿﻿BMI (kg/m2), mean (SD) | 22.80 (3.1) | 22.88 (2.5) | 22.77 (3.3) | 0.872 |  | 23.32 (2.0) | 22.72 (3.2) | 0.535 |  | 22.8 (2.9) | 22.8 (3.2) | 0.917 |
| Education: n (%) |  |  |  | 0.391 |  |  |  | 0.635 |  |  |  | 0.492 |
| High school less | 7 (7.3) | 1 (3.7) | 6 (8.7) |  |  | 1 (8.3) | 6 (7.1) |  |  | 2 (5.9) | 5 (8.1) |  |
| High school | 10 (10.4) | 2 (7.4) | 8 (11.6) |  |  | 1 (8.3) | 9 (10.7) |  |  | 3 (8.8) | 7 (11.3) |  |
| Bachelor’s degree | 58 (60.4) | 20 (74.1) | 38 (55.1) |  |  | 9 (75.0) | 49 (58.3) |  |  | 24 (70.6) | 34 (54.8) |  |
| Graduate degree | 21 (21.9) | 4 (14.8) | 17 (24.6) |  |  | 1 (8.3) | 20 (23.8) |  |  | 5 (14.7) | 16 (25.8) |  |
| Exercise (≥3/week): n (%) | 52 (54.2) | 10 (37.0) | 42 (60.9) | 0.060 |  | 3 (25.0) | 49 (58.3) | 0.063 |  | 12 (35.3) | 40 (64.5) | 0.011 |
| Smoking: n (%) | 1 (1.0) | 0 (0.0) | 1 (1.4) | 1.000 |  | 0 (0.0) | 1 (1.2) | 1.000 |  | 1 (2.9) | 0 (0.0) | 0.759 |
| Alcohol: n (%) | 24 (25.0) | 8 (29.6) | 16 (23.2) | 0.694 |  | 6 (50.0) | 18 (21.4) | 0.075 |  | 11 (32.4) | 13 (21.0) | 0.324 |
| Self ﻿rated health: n (%) |  |  |  | <0.001 |  |  |  | <0.001 |  |  |  | 0.017 |
| Good | 45 (46.9) | 22 (81.5) | 23 (33.3) |  |  | 12 (100.0) | 33 (39.3) |  |  | 22 (64.7) | 23 (37.1) |  |
| Pain duration (y): mean (SD) | 2.23 (2.5) | 2.19 (2.5) | 2.24 (2.5) | 0.936 |  | 1.72 (2.5) | 2.30 (2.5) | 0.448 |  | 2.6 (2.9) | 2.0 (2.3) | 0.291 |
| Sick leave due to pain: n (%) | 26 (27.1) | 6 (22.2) | 20 (29.0) | 0.678 |  | 2 (16.7) | 24 (28.6) | 0.602 |  | 7 (20.6) | 19 (30.6) | 0.412 |
| PPT(N): mean (SD) | 25.58 (6.6) | 25.13 (6.4) | 25.76 (6.7) | 0.677 |  | 23.85 (7.1) | 25.83 (6.5) | 0.331 |  | 24.7 (6.4) | 26.1 (6.7) | 0.315 |
| Pain medicine use: n (%) | 3 (3.1) | 1 (3.7) | 2 (2.9) | 1.000 |  | 1 (8.3) | 2 (2.4) | 0.825 |  | 1 (2.9) | 2 (3.2) | 1.000 |
| Pain intensity (NRS): mean (SD) | 7.08 (1.3) | 7.41 (1.3) | 6.96 (1.2) | 0.111 |  | 8.08 (0.8) | 6.94 (1.2) | 0.003 |  | 7.5 (1.2) | 6.8 (1.2) | 0.009 |
| Pain interference (BPI): mean (SD) | 3.87 (2.5) | 5.64 (2.3) | 3.18 (2.2) | <0.001 |  | 6.97 (1.9) | 3.43 (2.2) | <0.001 |  | 4.6 (2.7) | 3.5 (2.2) | 0.036 |
| Pain diagnoses: n (%) |  |  |  |  |  |  |  |  |  |  |  |  |
| Neck pain | 71 (74.0) | 19 (70.4) | 52 (75.4) | 0.808 |  | 8 (66.7) | 63 (75.0) | 0.792 |  | 27 (79.4) | 44 (71.0) | 0.510 |
| Low back pain | 29 (30.2) | 9 (33.3) | 20 (29.0) | 0.865 |  | 4 (33.3) | 25 (29.8) | 1.000 |  | 8 (23.5) | 21 (33.9) | 0.410 |
| Knee pain | 6 (6.2) | 1 (3.7) | 5 (7.2) | 0.860 |  | 0 (0.0) | 6 (7.1) | 0.750 |  | 2 (5.9) | 4 (6.5) | 1.000 |
| Depression (PHQ-9): mean (SD) | 4.24 (3.0) | 7.85 (3.1) | 2.83 (1.5) | <0.001 |  | 9.17 (4.1) | 3.54 (2.0) | <0.001 |  | 6.3 (3.8) | 3.1 (1.6) | <0.001 |
| Anxiety (GAD-7): mean (SD) | 2.98 (2.6) | 5.19 (3.4) | 2.12 (1.6) | <0.001 |  | 8.00 (2.9) | 2.26 (1.6) | <0.001 |  | 4.4 (3.4) | 2.2 (1.5) | <0.001 |
| Sleep (PISQ): mean (SD) | 5.43 (2.8) | 7.00 (2.5) | 4.81 (1.6) | <0.001 |  | 9.00 (1.7) | 4.92 (1.6) | <0.001 |  | 7.7 (1.8) | 4.2 (0.9) | <0.001 |
| Human personality (NEO-FFI) mean (SD): |  |  |  |  |  |  |  |  |  |  |  |  |
| Extraversion | 60.64 (5.9) | 58.15 (6.3) | 61.61 (5.4) | 0.009 |  | 56.83 (6.2) | 61.18 (5.6) | 0.015 |  | 59.3 (5.6) | 61.4 (5.9) | 0.097 |
| Openness | 37.53 (5.7) | 34.15 (4.9) | 38.86 (5.5) | <0.001 |  | 34.33 (2.8) | 37.99 (5.9) | 0.038 |  | 35.3 (5.4) | 38.4 (5.6) | 0.004 |
| Conscientiousness | 43.72 (5.7) | 41.85 (7.1) | 44.45 (4.9) | 0.045 |  | 39.67 (7.3) | 44.30 (5.3) | 0.008 |  | 42.7 (6.3) | 44.3 (5.3) | 0.187 |
| Agreeableness | 41.46 (4.6) | 39.85 (5.0) | 42.09 (4.3) | 0.034 |  | 38.08 (3.9) | 41.94 (4.6) | 0.007 |  | 39.5 (3.9) | 42.6 (4.7) | 0.002 |
| Neuroticism | 29.18 (5.1) | 33.30 (7.1) | 27.57 (4.3) | <0.001 |  | 34.67 (7.0) | 28.39 (5.2) | <0.001 |  | 31.2 (6.8) | 28.1 (4.9) | 0.009 |

PPT, pain pressure threshold; BMI: body mass index. NRS: numerical rating scale. BPI: Brief Pain Inventory. PHQ-9, Patient Health Questionnaire-9; GAD-7, Generalized Anxiety Disorder Scale-7; PSQI, Pittsburgh Sleep Quality Index; NEO-FFI, Neuroticism Extraversion Openness Five-Factor Inventory. Differences between the depression, anxiety, and sleep disturbance and non- depression, anxiety, and sleep disturbance groups were examined by chi-square test for categorical variables and Student's t-test or Mann-Whitney test for continuous variables. Depression was defined using the PHQ-9 cutoff of 5 or higher; anxiety was defined using the GAD-7 cutoff of 5 or higher; sleep disturbance was defined as a total PSQI score of > 5.

**Center 3**

| **Measure** | **Total**  **(n=35)** | **Depression** | | |  | **Anxiety** | | |  | **Sleep disturbance** | | |
| --- | --- | --- | --- | --- | --- | --- | --- | --- | --- | --- | --- | --- |
| **Depression**  **(n=16)** | **Non-depression**  **(n=19)** | ***P*** |  | **Anxiety**  **(n=9)** | **Non-anxiety**  **(n=26)** | ***P*** |  | **Sleep disturbance**  **(n=19** | **Normal sleep**  **(n=16)** | ***P*** |
| Age(y): mean (SD) | 37.7 (10.8) | 36.8 (11.7) | 38.5 (10.2) | 0.647 |  | 35.2 (9.6) | 38.6 (11.2) | 0.425 |  | 35.6 (9.1) | 40.3 (12.3) | 0.201 |
| Female: n (%) | 25 (71.4) | 13 (81.2) | 12 (63.2) | 0.421 |  | 7 (77.8) | 18 (69.2) | 0.951 |  | 15 (78.9) | 10 (62.5) | 0.486 |
| ﻿﻿BMI (kg/m2), mean (SD) | 22.6 (3.0) | 22.3 (2.7) | 22.8 (3.3) | 0.658 |  | 23.5 (2.6) | 22.2 (3.1) | 0.283 |  | 21.9 (2.7) | 23.3 (3.2) | 0.169 |
| Education: n (%) |  |  |  | 0.745 |  |  |  | 0.566 |  |  |  | 0.139 |
| High school less | 0 (0.0) | 0 (0.0) | 0 (0.0) |  |  | 0 (0.0) | 0 (0.0) |  |  | 0 (0.0) | 3 (18.8) |  |
| High school | 3 (8.6) | 2 (12.5) | 1 (5.3) |  |  | 0 (0.0) | 3 (11.5) |  |  | 11 (57.9) | 7 (43.8) |  |
| Bachelor’s degree | 18 (51.4) | 8 (50.0) | 10 (52.6) |  |  | 5 (55.6) | 13 (50.0) |  |  | 8 (42.1) | 6 (37.5) |  |
| Graduate degree | 14 (40.0) | 6 (37.5) | 8 (42.1) |  |  | 4 (44.4) | 10 (38.5) |  |  | 0 (0.0) | 0 (0.0) |  |
| Exercise (≥3/week): n (%) | 13 (37.1) | 4 (25.0) | 9 (47.4) | 0.311 |  | 4 (44.4) | 9 (34.6) | 0.900 |  | 4 (21.1) | 9 (56.2) | 0.073 |
| Smoking: n (%) | 4 (11.4) | 2 (12.5) | 2 (10.5) | 1.000 |  | 2 (22.2) | 2 (7.7) | 0.567 |  | 3 (15.8) | 1 (6.2) | 0.726 |
| Alcohol: n (%) | 14 (40.0) | 5 (31.2) | 9 (47.4) | 0.533 |  | 3 (33.3) | 11 (42.3) | 0.937 |  | 8 (42.1) | 6 (37.5) | 1.000 |
| Self ﻿rated health: n (%) |  |  |  | 0.001 |  |  |  | 0.097 |  |  |  | 0.945 |
| Good | 21 (60.0) | 15 (93.8) | 6 (31.6) |  |  | 8 (88.9) | 13 (50.0) |  |  | 12 (63.2) | 9 (56.2) |  |
| Pain duration (y): mean (SD) | 5.1 (4.2) | 6.0 (5.3) | 4.3 (2.9) | 0.251 |  | 6.8 (6.4) | 4.5 (3.1) | 0.158 |  | 5.4 (4.9) | 4.6 (3.0) | 0.569 |
| Sick leave due to pain: n (%) | 11 (31.4) | 6 (37.5) | 5 (26.3) | 0.730 |  | 3 (33.3) | 8 (30.8) | 1.000 |  | 8 (42.1) | 3 (18.8) | 0.264 |
| PPT(N): mean (SD) | 20.6 (7.0) | 19.3 (5.8) | 21.6 (7.9) | 0.496 |  | 20.4 (5.2) | 20.6 (7.6) | 0.955 |  | 19.2 (5.9) | 22.2 (8.0) | 0.222 |
| Pain medicine use: n (%) | 8 (22.9) | 5 (31.2) | 3 (15.8) | 0.436 |  | 4 (44.4) | 4 (15.4) | 0.184 |  | 6 (31.6) | 2 (12.5) | 0.350 |
| Pain intensity (NRS): mean (SD) | 5.7 (1.3) | 5.9 (1.5) | 5.6 (1.1) | 0.509 |  | 5.7 (1.6) | 5.7 (1.2) | 0.901 |  | 5.6 (1.3) | 5.9 (1.4) | 0.139 |
| Pain interference (BPI): mean (SD) | 3.3 (2.1) | 4.1 (2.0) | 2.6 (2.0) | 0.037 |  | 3.9 (2.1) | 3.1 (2.1) | 0.319 |  | 3.8 (2.5) | 2.8 (1.5) | 0.163 |
| Pain diagnoses: n (%) |  |  |  |  |  |  |  |  |  |  |  |  |
| Neck pain | 24 (68.6) | 8 (50.0) | 16 (84.2) | 0.071 |  | 5 (55.6) | 19 (73.1) | 0.576 |  | 11 (57.9) | 13 (81.2) | 0.264 |
| Low back pain | 25 (71.4) | 14 (87.5) | 11 (57.9) | 0.120 |  | 9 (100.0) | 16 (61.5) | 0.076 |  | 17 (89.5) | 8 (50.0) | 0.028 |
| Knee pain | 3 (8.6) | 2 (12.5) | 1 (5.3) | 0.876 |  | 1 (11.1) | 2 (7.7) | 1.000 |  | 1 (5.3) | 2 (12.5) | 0.876 |
| Depression (PHQ-9): mean (SD) | 4.9 (3.4) | 8.1 (2.1) | 2.3 (1.6) | <0.001 |  | 7.2 (4.0) | 4.2 (2.9) | 0.017 |  | 6.8 (2.9) | 2.8 (2.6) | <0.001 |
| Anxiety (GAD-7): mean (SD) | 3.9 (3.5) | 5.5 (3.7) | 2.6 (2.7) | 0.012 |  | 8.8 (2.5) | 2.3 (1.7) | <0.001 |  | 4.7 (3.7) | 3.0 (2.9) | 0.141 |
| Sleep (PISQ): mean (SD) | 6.2 (2.9) | 7.4 (2.6) | 5.2 (2.8) | 0.021 |  | 6.9 (2.0) | 6.0 (3.1) | 0.435 |  | 8.2 (2.4) | 3.9 (1.0) | <0.001 |
| Human personality (NEO-FFI) mean (SD): |  |  |  |  |  |  |  |  |  |  |  |  |
| Extraversion | 59.0 (6.4) | 56.9 (4.9) | 60.8 (7.0) | 0.073 |  | 58.7 (3.8) | 59.2 (7.1) | 0.846 |  | 57.6 (4.9) | 60.8 (7.5) | 0.143 |
| Openness | 41.7 (6.0) | 41.3 (5.5) | 42.0 (6.5) | 0.759 |  | 42.8 (3.5) | 41.3 (6.6) | 0.521 |  | 41.0 (5.6) | 42.5 (6.4) | 0.451 |
| Conscientiousness | 44.1 (5.7) | 41.6 (4.0) | 46.2 (6.2) | 0.015 |  | 42.8 (5.2) | 44.5 (5.9) | 0.443 |  | 42.0 (3.6) | 46.5 (6.8) | 0.018 |
| Agreeableness | 40.9 (5.7) | 39.8 (3.5) | 41.8 (7.1) | 0.317 |  | 40.9 (2.7) | 40.9 (6.5) | 0.998 |  | 40.1 (3.6) | 41.9 (7.6) | 0.357 |
| Neuroticism | 33.3 (8.0) | 37.4 (5.0) | 29.7 (8.4) | 0.003 |  | 38.2 (5.3) | 31.5 (8.1) | 0.028 |  | 35.3 (6.8) | 30.9 (8.8) | 0.105 |

PPT, pain pressure threshold; BMI: body mass index. NRS: numerical rating scale. BPI: Brief Pain Inventory. PHQ-9, Patient Health Questionnaire-9; GAD-7, Generalized Anxiety Disorder Scale-7; PSQI, Pittsburgh Sleep Quality Index; NEO-FFI, Neuroticism Extraversion Openness Five-Factor Inventory. Differences between the depression, anxiety, and sleep disturbance and non- depression, anxiety, and sleep disturbance groups were examined by chi-square test for categorical variables and Student's t-test or Mann-Whitney test for continuous variables. Depression was defined using the PHQ-9 cutoff of 5 or higher; anxiety was defined using the GAD-7 cutoff of 5 or higher; sleep disturbance was defined as a total PSQI score of > 5.

**Center 5**

| **Measure** | **Total**  **(n=81)** | **Depression** | | |  | **Anxiety** | | |  | **Sleep disturbance** | | |
| --- | --- | --- | --- | --- | --- | --- | --- | --- | --- | --- | --- | --- |
| **Depression**  **(n=44)** | **Non-depression**  **(n=37)** | ***P*** |  | **Anxiety**  **(n=29)** | **Non-anxiety**  **(n=52)** | ***P*** |  | **Sleep disturbance**  **(n=38)** | **Normal sleep**  **(n=43)** | ***P*** |
| Age(y): mean (SD) | 40.1 (13.0) | 38.1 (10.8) | 42.4 (15.1) | 0.139 |  | 40.5 (13.5) | 39.8 (12.9) | 0.816 |  | 39.1 (12.3) | 40.9 (13.8) | 0.527 |
| Female: n (%) | 47 (58.0) | 23 (52.3) | 24 (64.9) | 0.359 |  | 19 (65.5) | 28 (53.8) | 0.432 |  | 22 (57.9) | 25 (58.1) | 1.000 |
| ﻿﻿BMI (kg/m2), mean (SD) | 23.0 (3.0) | 22.6 (3.0) | 23.4 (3.0) | 0.272 |  | 22.3 (2.4) | 23.4 (3.2) | 0.111 |  | 23.2 (2.8) | 22.9 (3.1) | 0.637 |
| Education: n (%) |  |  |  | 0.520 |  |  |  | 0.755 |  |  |  | 0.891 |
| High school less | 14 (17.3) | 6 (13.6) | 8 (21.6) |  |  | 4 (13.8) | 10 (19.2) |  |  | 6 (15.8) | 8 (18.6) |  |
| High school | 8 (9.9) | 3 (6.8) | 5 (13.5) |  |  | 4 (13.8) | 4 (7.7) |  |  | 3 (7.9) | 5 (11.6) |  |
| Bachelor’s degree | 52 (64.2) | 31 (70.5) | 21 (56.8) |  |  | 19 (65.5) | 33 (63.5) |  |  | 26 (68.4) | 26 (60.5) |  |
| Graduate degree | 7 (8.6) | 4 (9.1) | 3 (8.1) |  |  | 2 (6.9) | 5 (9.6) |  |  | 3 (7.9) | 4 (9.3) |  |
| Exercise (≥3/week): n (%) | 38 (46.9) | 16 (36.4) | 22 (59.5) | 0.064 |  | 8 (27.6) | 30 (57.7) | 0.018 |  | 18 (47.4) | 20 (46.5) | 1.000 |
| Smoking: n (%) | 13 (16.0) | 9 (20.5) | 4 (10.8) | 0.382 |  | 3 (10.3) | 10 (19.2) | 0.426 |  | 7 (18.4) | 6 (14.0) | 0.808 |
| Alcohol: n (%) | 26 (32.1) | 15 (34.1) | 11 (29.7) | 0.857 |  | 10 (34.5) | 16 (30.8) | 0.964 |  | 14 (36.8) | 12 (27.9) | 0.534 |
| Self ﻿rated health: n (%) |  |  |  | 0.026 |  |  |  | 0.161 |  |  |  | 0.815 |
| Good | 49 (60.5) | 32 (72.7) | 17 (45.9) |  |  | 21 (72.4) | 28 (53.8) |  |  | 24 (63.2) | 25 (58.1) |  |
| Pain duration (y): mean (SD) | 4.8 (5.7) | 3.5 (3.8) | 6.3 (7.1) | 0.024 |  | 3.2 (3.6) | 5.7 (5.4) | 0.057 |  | 3.8 (4.4) | 5.7 (6.6) | 0.174 |
| Sick leave due to pain: n (%) | 20 (24.7) | 15 (34.1) | 5 (13.5) | 0.060 |  | 5 (17.2) | 15 (28.8) | 0.372 |  | 10 (26.3) | 10 (23.3) | 0.952 |
| PPT(N): mean (SD) | 35.1 (9.2) | 34.7 (8.7) | 35.6 (9.9) | 0.643 |  | 34.1 (7.8) | 35.6 (10.0) | 0.487 |  | 35.6 (8.7) | 34.6 (9.8) | 0.640 |
| Pain medicine use: n (%) | 8 (9.9) | 5 (11.4) | 3 (8.1) | 0.908 |  | 2 (6.9) | 6 (11.5) | 0.777 |  | 3 (7.9) | 5 (11.6) | 0.850 |
| Pain intensity (NRS): mean (SD) | 6.5 (1.4) | 6.8 (1.4) | 6.2 (1.3) | 0.026 |  | 6.6 (1.1) | 6.5 (1.5) | 0.789 |  | 6.9 (1.4) | 6.2 (1.3) | 0.025 |
| Pain interference (BPI): mean (SD) | 3.4 (1.6) | 3.9 (1.6) | 2.8 (1.5) | 0.002 |  | 3.7 (1.3) | 3.2 (1.7) | 0.152 |  | 4.0 (1.6) | 2.8 (1.4) | 0.001 |
| Pain diagnoses: n (%) |  |  |  |  |  |  |  |  |  |  |  |  |
| Neck pain | 62 (76.5) | 35 (79.5) | 27 (73.0) | 0.666 |  | 23 (79.3) | 39 (75.0) | 0.869 |  | 29 (76.3) | 33 (76.7) | 1.000 |
| Low back pain | 39 (48.1) | 19 (43.2) | 20 (54.1) | 0.452 |  | 13 (44.8) | 26 (50.0) | 0.830 |  | 16 (42.1) | 23 (53.5) | 0.423 |
| Knee pain | 3 (3.7) | 1 (2.3) | 2 (5.4) | 0.878 |  | 1 (3.4) | 2 (3.8) | 1.000 |  | 1 (2.6) | 2 (4.7) | 1.000 |
| Depression (PHQ-9): mean (SD) | 5.4 (4.3) | 8.3 (3.5) | 1.8 (1.4) | <0.001 |  | 8.8 (3.6) | 3.4 (2.6) | <0.001 |  | 3.9 (4.3) | 3.0 (4.0) | 0.003 |
| Anxiety (GAD-7): mean (SD) | 4.0 (3.8) | 5.8 (3.9) | 1.7 (2.2) | <0.001 |  | 8.1 (4.1) | 1.6 (1.5) | <0.001 |  | 5.2 (4.1) | 3.8 (2.9) | 0.002 |
| Sleep (PISQ): mean (SD) | 5.4 (2.8) | 6.5 (2.8) | 4.0 (2.2) | 0.001 |  | 6.7 (2.9) | 4.6 (2.5) | 0.001 |  | 7.8 (2.0) | 3.2 (1.2) | <0.001 |
| Human personality (NEO-FFI) mean (SD): |  |  |  |  |  |  |  |  |  |  |  |  |
| Extraversion | 61.2 (4.4) | 61.4 (4.2) | 61.0 (4.6) | 0.714 |  | 60.0 (5.2) | 61.7 (4.4) | 0.196 |  | 32.2 (4.1) | 30.7 (4.3) | 0.237 |
| Openness | 38.5 (3.8) | 38.7 (3.7) | 38.4 (4.0) | 0.699 |  | 38.6 (3.7) | 38.5 (3.9) | 0.875 |  | 38.5 (3.9) | 38.6 (3.7) | 0.900 |
| Conscientiousness | 42.8 (5.1) | 43.0 (5.0) | 42.7 (5.3) | 0.794 |  | 41.7 (3.5) | 43.5 (5.7) | 0.121 |  | 43.2 (5.3) | 42.5 (5.0) | 0.543 |
| Agreeableness | 39.5 (4.6) | 39.1 (4.7) | 40.0 (4.4) | 0.413 |  | 37.8 (4.7) | 40.5 (4.3) | 0.012 |  | 39.2 (4.3) | 39.8 (4.8) | 0.604 |
| Neuroticism | 31.4 (6.2) | 32.8 (6.2) | 29.7 (5.9) | 0.022 |  | 35.4 (4.4) | 29.4 (5.7) | <0.001 |  | 61.7 (6.7) | 60.8 (6.1) | 0.343 |

PPT, pain pressure threshold; BMI: body mass index. NRS: numerical rating scale. BPI: Brief Pain Inventory. PHQ-9, Patient Health Questionnaire-9; GAD-7, Generalized Anxiety Disorder Scale-7; PSQI, Pittsburgh Sleep Quality Index; NEO-FFI, Neuroticism Extraversion Openness Five-Factor Inventory. Differences between the depression, anxiety, and sleep disturbance and non- depression, anxiety, and sleep disturbance groups were examined by chi-square test for categorical variables and Student's t-test or Mann-Whitney test for continuous variables. Depression was defined using the PHQ-9 cutoff of 5 or higher; anxiety was defined using the GAD-7 cutoff of 5 or higher; sleep disturbance was defined as a total PSQI score of > 5.

**Center 6**

| **Measure** | **Total**  **(n=39)** | **Depression** | | |  | **Anxiety** | | |  | **Sleep disturbance** | | |
| --- | --- | --- | --- | --- | --- | --- | --- | --- | --- | --- | --- | --- |
| **Depression**  **(n=21)** | **Non-depression**  **(n=18)** | **p-value** |  | **Anxiety**  **(n=9)** | **Non-anxiety**  **(n=30)** | **p-value** |  | **Sleep disturbance**  **(n=22)** | **Normal sleep**  **(n=17)** | **p-value** |
| Age(y): mean (SD) | 46.0 (16.7) | 38.2 (15.4) | 52.6 (15.1) | 0.006 |  | 33.8 (13.3) | 49.6 (16.1) | 0.011 |  | 44.7 (14.5) | 47.7 (19.6) | 0.590 |
| Female: n (%) | 24 (61.5) | 13 (72.2) | 11 (52.4) | 0.347 |  | 6 (66.7) | 18 (60.0) | 1.000 |  | 15 (68.2) | 9 (52.9) | 0.523 |
| ﻿﻿BMI (kg/m2), mean (SD) | 24.1 (3.7) | 22.7 (2.8) | 25.3 (3.9) | 0.025 |  | 22.1 (1.5) | 24.8 (3.9) | 0.053 |  | 23.4 (3.7) | 25.1 (3.5) | 0.160 |
| Education: n (%) |  |  |  | 0.519 |  |  |  | 0.189 |  |  |  | 0.724 |
| High school less | 8 (20.5) | 4 (22.2) | 4 (19.0) |  |  | 1 (11.1) | 7 (23.3) |  |  | 4 (18.2) | 4 (23.5) |  |
| High school | 7 (17.9) | 2 (11.1) | 5 (23.8) |  |  | 0 (0.0) | 7 (23.3) |  |  | 3 (13.6) | 4 (23.5) |  |
| Bachelor’s degree | 20 (51.3) | 9 (50.0) | 11 (52.4) |  |  | 6 (66.7) | 14 (46.7) |  |  | 13 (59.1) | 7 (41.2) |  |
| Graduate degree | 4 (10.3) | 3 (16.7) | 1 (4.8) |  |  | 2 (22.2) | 2 (6.7) |  |  | 2 (9.1) | 2 (11.8) |  |
| Exercise (≥3/week): n (%) | 20 (51.3) | 13 (72.2) | 7 (33.3) | 0.036 |  | 6 (66.7) | 14 (46.7) | 0.501 |  | 12 (54.5) | 8 (47.1) | 0.888 |
| Smoking: n (%) | 5 (12.8) | 2 (11.1) | 3 (14.3) | 1.000 |  | 2 (22.2) | 3 (10.0) | 0.694 |  | 3 (13.6) | 2 (11.8) | 1.000 |
| Alcohol: n (%) | 13 (33.3) | 6 (33.3) | 7 (33.3) | 1.000 |  | 3 (33.3) | 10 (33.3) | 1.000 |  | 6 (27.3) | 7 (41.2) | 0.586 |
| Self ﻿rated health: n (%) |  |  |  | 0.515 |  |  |  | 0.867 |  |  |  | 0.917 |
| Good | 10 (25.6) | 6 (33.3) | 4 (19.0) |  |  | 3 (33.3) | 7 (23.3) |  |  | 5 (22.7) | 5 (29.4) |  |
| Pain duration (y): mean (SD) | 0.6 (0.5) | 0.8 (0.6) | 0.6 (0.4) | 0.252 |  | 0.8 (0.6) | 0.6 (0.5) | 0.282 |  | 0.7 (0.5) | 0.6 (0.6) | 0.671 |
| Sick leave due to pain: n (%) | 14 (35.9) | 3 (16.7) | 11 (52.4) | 0.047 |  | 1 (11.1) | 13 (43.3) | 0.170 |  | 6 (27.3) | 8 (47.1) | 0.347 |
| PPT(N): mean (SD) | 30.0 (9.1) | 32.9 (8.8) | 27.4 (8.8) | 0.059 |  | 33.9 (10.0) | 28.8 (8.6) | 0.135 |  | 28.2 (8.4) | 32.2 (9.7) | 0.181 |
| Pain medicine use: n (%) | 1 (2.6) | 1 (5.6) | 0 (0.0) | 0.938 |  | 0 (0.0) | 1 (3.3) | 1.000 |  | 0 (0.0) | 1 (5.9) | 0.898 |
| Pain intensity (NRS): mean (SD) | 5.3 (1.1) | 5.2 (1.0) | 5.5 (1.3) | 0.402 |  | 5.2 (1.0) | 5.4 (1.2) | 0.742 |  | 5.4 (1.0) | 5.3 (1.3) | 0.852 |
| Pain interference (BPI): mean (SD) | 2.5 (1.5) | 2.5 (1.5) | 2.4 (1.5) | 0.838 |  | 3.1 (1.8) | 2.3 (1.4) | 0.142 |  | 2.9 (1.8) | 2.0 (0.9) | 0.066 |
| Pain diagnoses: n (%) |  |  |  |  |  |  |  |  |  |  |  |  |
| Neck pain | 15 (38.5) | 7 (38.9) | 8 (38.1) | 1.000 |  | 6 (66.7) | 9 (30.0) | 0.111 |  | 9 (40.9) | 6 (35.3) | 0.980 |
| Low back pain | 20 (51.3) | 8 (44.4) | 12 (57.1) | 0.639 |  | 3 (33.3) | 17 (56.7) | 0.396 |  | 10 (45.5) | 10 (58.8) | 0.613 |
| Knee pain | 7 (17.9) | 4 (22.2) | 3 (14.3) | 0.822 |  | 0 (0.0) | 7 (23.3) | 0.269 |  | 5 (22.7) | 2 (11.8) | 0.643 |
| Depression (PHQ-9): mean (SD) | 4.6 (3.2) | 7.3 (2.8) | 2.3 (1.2) | <0.001 |  | 8.2 (3.7) | 3.5 (2.2) | <0.001 |  | 4.8 (3.3) | 4.3 (3.2) | 0.623 |
| Anxiety (GAD-7): mean (SD) | 3.4 (3.1) | 5.5 (3.2) | 1.7 (1.5) | <0.001 |  | 7.7 (3.1) | 2.2 (1.6) | <0.001 |  | 4.0 (3.6) | 2.8 (2.1) | 0.233 |
| Sleep (PISQ): mean (SD) | 6.1 (2.6) | 6.6 (2.7) | 5.7 (2.4) | 0.283 |  | 7.1 (2.6) | 5.8 (2.5) | 0.168 |  | 7.7 (2.1) | 3.9 (1.1) | <0.001 |
| Human personality (NEO-FFI) mean (SD): |  |  |  |  |  |  |  |  |  |  |  |  |
| Extraversion | 60.5 (5.0) | 58.8 (6.6) | 61.9 (4.5) | 0.057 |  | 57.6 (4.5) | 61.3 (4.8) | 0.044 |  | 58.9 (5.4) | 62.5 (3.6) | 0.020 |
| Openness | 38.0 (5.9) | 38.3 (4.9) | 37.7 (6.7) | 0.729 |  | 37.9 (5.6) | 38.0 (6.0) | 0.961 |  | 37.5 (5.8) | 38.7 (6.0) | 0.536 |
| Conscientiousness | 44.9 (5.0) | 42.5 (5.6) | 47.0 (3.2) | 0.004 |  | 41.3 (6.8) | 46.0 (3.8) | 0.012 |  | 45.8 (4.8) | 43.8 (5.2) | 0.231 |
| Agreeableness | 41.1 (4.4) | 40.1 (3.9) | 42.0 (4.8) | 0.185 |  | 40.4 (4.2) | 41.3 (4.5) | 0.631 |  | 41.0 (5.0) | 41.2 (3.6) | 0.903 |
| Neuroticism | 29.7 (6.4) | 33.1 (5.1) | 26.9 (4.8) | 0.002 |  | 36.4 (6.7) | 27.7 (4.8) | <0.001 |  | 31.6 (6.5) | 27.2 (5.6) | 0.032 |

PPT, pain pressure threshold; BMI: body mass index. NRS: numerical rating scale. BPI: Brief Pain Inventory. PHQ-9, Patient Health Questionnaire-9; GAD-7, Generalized Anxiety Disorder Scale-7; PSQI, Pittsburgh Sleep Quality Index; NEO-FFI, Neuroticism Extraversion Openness Five-Factor Inventory. Differences between the depression, anxiety, and sleep disturbance and non- depression, anxiety, and sleep disturbance groups were examined by chi-square test for categorical variables and Student's t-test or Mann-Whitney test for continuous variables. Depression was defined using the PHQ-9 cutoff of 5 or higher; anxiety was defined using the GAD-7 cutoff of 5 or higher; sleep disturbance was defined as a total PSQI score of > 5.

**Center 7**

| **Measure** | **Total**  **(n=156)** | **Depression** | | |  | **Anxiety** | | |  | **Sleep disturbance** | | |
| --- | --- | --- | --- | --- | --- | --- | --- | --- | --- | --- | --- | --- |
| **Depression**  **(n=63)** | **Non-depression**  **(n=93)** | **p-value** |  | **Anxiety**  **(n=25)** | **Non-anxiety**  **(n=131)** | **p-value** |  | **Sleep disturbance**  **(n=71)** | **Normal sleep**  **(n=85)** | **p-value** |
| Age(y): mean (SD) | 42.1 (14.4) | 41.1 (14.9) | 42.9 (14.2) | 0.445 |  | 38.4 (16.5) | 42.9 (14.0) | 0.158 |  | 41.0 (13.6) | 43.1 (15.1) | 0.375 |
| Female: n (%) | 98 (62.8) | 43 (68.3) | 55 (59.1) | 0.324 |  | 18 (72.0) | 80 (61.1) | 0.418 |  | 46 (64.8) | 52 (61.2) | 0.765 |
| ﻿﻿BMI (kg/m2), mean (SD) | 22.9 (3.3) | 22.0 (3.0) | 23.5 (3.3) | 0.005 |  | 22.2 (2.8) | 23.0 (3.3) | 0.229 |  | 22.5 (3.0) | 23.2 (3.5) | 0.213 |
| Education: n (%) |  |  |  | 0.015 |  |  |  | 0.911 |  |  |  | 0.074 |
| High school less | 17 (10.9) | 7 (11.1) | 10 (10.8) |  |  | 3 (12.0) | 14 (10.7) |  |  | 4 (5.6) | 13 (15.3) |  |
| High school | 23 (14.7) | 16 (25.4) | 7 (7.5) |  |  | 3 (12.0) | 20 (15.3) |  |  | 15 (21.1) | 8 (9.4) |  |
| Bachelor’s degree | 92 (59.0) | 30 (47.6) | 62 (66.7) |  |  | 16 (64.0) | 76 (58.0) |  |  | 41 (57.7) | 51 (60.0) |  |
| Graduate degree | 24 (15.4) | 10 (15.9) | 14 (15.1) |  |  | 3 (12.0) | 21 (16.0) |  |  | 11 (15.5) | 13 (15.3) |  |
| Exercise (≥3/week): n (%) | 63 (40.4) | 24 (38.1) | 39 (41.9) | 0.754 |  | 11 (44.0) | 52 (39.7) | 0.857 |  | 27 (38.0) | 36 (42.4) | 0.701 |
| Smoking: n (%) | 8 (5.1) | 4 (6.3) | 4 (4.3) | 0.842 |  | 2 (8.0) | 6 (4.6) | 0.829 |  | 4 (5.6) | 4 (4.7) | 1.000 |
| Alcohol: n (%) | 43 (27.6) | 20 (31.7) | 23 (24.7) | 0.436 |  | 7 (28.0) | 36 (27.5) | 1.000 |  | 21 (29.6) | 22 (25.9) | 0.738 |
| Self ﻿rated health: n (%) |  |  |  | 0.061 |  |  |  | 0.232 |  |  |  | <0.001 |
| Good | 99 (63.5) | 46 (73.0) | 53 (57.0) |  |  | 19 (76.0) | 80 (61.1) |  |  | 56 (78.9) | 43 (50.6) |  |
| Pain duration (y): mean (SD) | 2.1 (3.1) | 2.4 (4.1) | 1.9 (2.2) | 0.374 |  | 3.2 (4.8) | 1.9 (2.7) | 0.054 |  | 2.2 (3.8) | 2.0 (2.5) | 0.704 |
| Sick leave due to pain: n (%) | 46 (29.5) | 18 (28.6) | 28 (30.1) | 0.978 |  | 6 (24.0) | 40 (30.5) | 0.676 |  | 27 (38.0) | 19 (22.4) | 0.050 |
| PPT(N): mean (SD) | 32.3 (10.7) | 31.0 (12.2) | 33.2 (9.5) | 0.209 |  | 26.4 (8.0) | 33.4 (10.8) | 0.002 |  | 33.3 (11.6) | 31.5 (9.9) | 0.277 |
| Pain medicine use: n (%) | 6 (3.8) | 2 (3.2) | 4 (4.3) | 1.000 |  | 1 (4.0) | 5 (3.8) | 1.000 |  | 1 (1.4) | 5 (5.9) | 0.303 |
| Pain intensity (NRS): mean (SD) | 6.3 (1.2) | 6.4 (1.2) | 6.2 (1.3) | 0.257 |  | 6.6 (1.2) | 6.3 (1.2) | 0.267 |  | 6.5 (1.1) | 6.2 (1.4) | 0.188 |
| Pain interference (BPI): mean (SD) | 3.1 (1.7) | 3.7 (1.6) | 2.7 (1.4) | <0.001 |  | 4.5 (1.6) | 2.9 (1.6) | <0.001 |  | 3.7 (1.5) | 2.7 (1.8) | <0.001 |
| Pain diagnoses: n (%) |  |  |  |  |  |  |  |  |  |  |  |  |
| Neck pain | 92 (59.0) | 39 (61.9) | 53 (57.0) | 0.655 |  | 16 (64.0) | 76 (58.0) | 0.737 |  | 45 (63.4) | 47 (55.3) | 0.390 |
| Low back pain | 68 (43.6) | 27 (42.9) | 41 (44.1) | 1.000 |  | 13 (52.0) | 55 (42.0) | 0.481 |  | 34 (47.9) | 34 (40.0) | 0.408 |
| Knee pain | 8 (5.1) | 2 (3.2) | 6 (6.5) | 0.589 |  | 2 (8.0) | 6 (4.6) | 0.829 |  | 3 (4.2) | 5 (5.9) | 0.918 |
| Depression (PHQ-9): mean (SD) | 4.4 (3.5) | 7.8 (2.6) | 2.0 (1.7) | <0.001 |  | 8.8 (3.1) | 3.5 (2.9) | <0.001 |  | 6.4 (3.4) | 2.6 (2.4) | <0.001 |
| Anxiety (GAD-7): mean (SD) | 3.2 (3.1) | 5.5 (3.3) | 1.7 (1.6) | <0.001 |  | 9.0 (2.3) | 2.2 (1.7) | <0.001 |  | 4.8 (3.4) | 2.0 (1.4) | <0.001 |
| Sleep (PISQ): mean (SD) | 5.5 (3.2) | 7.3 (3.2) | 4.2 (2.6) | <0.001 |  | 8.0 (3.2) | 5.0 (3.0) | <0.001 |  | 8.3 (2.2) | 3.1 (2.2) | <0.001 |
| Human personality (NEO-FFI) mean (SD): |  |  |  |  |  |  |  |  |  |  |  |  |
| Extraversion | 59.5 (7.2) | 57.9 (6.4) | 60.6 (7.6) | 0.019 |  | 59.0 (5.2) | 59.6 (7.6) | 0.729 |  | 57.1 (7.5) | 61.5 (6.4) | <0.001 |
| Openness | 38.0 (5.6) | 36.8 (4.9) | 38.7 (5.9) | 0.033 |  | 37.0 (5.2) | 38.2 (5.7) | 0.349 |  | 36.8 (6.0) | 39.0 (5.0) | 0.012 |
| Conscientiousness | 41.6 (7.7) | 39.3 (6.9) | 43.2 (7.8) | 0.002 |  | 41.6 (7.6) | 41.6 (7.7) | 0.986 |  | 40.3 (8.2) | 42.7 (7.1) | 0.055 |
| Agreeableness | 40.0 (5.1) | 39.8 (4.3) | 40.2 (5.1) | 0.663 |  | 39.0 (4.8) | 40.2 (5.1) | 0.272 |  | 40.6 (5.3) | 39.5 (4.9) | 0.194 |
| Neuroticism | 32.7 (7.3) | 35.2 (6.4) | 30.9 (7.4) | <0.001 |  | 36.4 (7.3) | 31.9 (7.1) | 0.005 |  | 35.0 (8.0) | 30.7 (6.0) | <0.001 |

PPT, pain pressure threshold; BMI: body mass index. NRS: numerical rating scale. BPI: Brief Pain Inventory. PHQ-9, Patient Health Questionnaire-9; GAD-7, Generalized Anxiety Disorder Scale-7; PSQI, Pittsburgh Sleep Quality Index; NEO-FFI, Neuroticism Extraversion Openness Five-Factor Inventory. Differences between the depression, anxiety, and sleep disturbance and non- depression, anxiety, and sleep disturbance groups were examined by chi-square test for categorical variables and Student's t-test or Mann-Whitney test for continuous variables. Depression was defined using the PHQ-9 cutoff of 5 or higher; anxiety was defined using the GAD-7 cutoff of 5 or higher; sleep disturbance was defined as a total PSQI score of > 5.

**Center 8**

| **Measure** | **Total**  **(n=105)** | **Depression** | | |  | **Anxiety** | | |  | **Sleep disturbance** | | |
| --- | --- | --- | --- | --- | --- | --- | --- | --- | --- | --- | --- | --- |
| **Depression**  **(n=39)** | **Non-depression**  **(n=66)** | **p-value** |  | **Anxiety**  **(n=20)** | **Non-anxiety**  **(n=85)** | **p-value** |  | **Sleep disturbance**  **(n=55)** | **Normal sleep**  **(n=50)** | **p-value** |
| Age(y): mean (SD) | 37.7 (18.4) | 35.3 (15.6) | 39.1 (19.2) | 0.307 |  | 32.7 (13.1) | 38.9 (19.3) | 0.179 |  | 40.5 (19.0) | 34.5 (17.3) | 0.095 |
| Female: n (%) | 68 (64.8) | 26 (66.7) | 42 (63.6) | 0.918 |  | 12 (60.0) | 56 (65.9) | 0.814 |  | 36 (65.5) | 32 (64.0) | 1.000 |
| ﻿﻿BMI (kg/m2), mean (SD) | 22.3 (3.1) | 22.2 (3.4) | 22.3 (2.8) | 0.880 |  | 21.5 (2.9) | 22.5 (3.1) | 0.210 |  | 22.5 (3.0) | 22.1 (3.1) | 0.516 |
| Education: n (%) |  |  |  | 0.657 |  |  |  | 0.090 |  |  |  | 0.081 |
| High school less | 13 (12.4) | 4 (10.3) | 9 (13.6) |  |  | 0 (0.0) | 13 (15.3) |  |  | 9 (16.4) | 4 (8.0) |  |
| High school | 8 (7.6) | 2 (5.1) | 6 (9.1) |  |  | 2 (10.0) | 6 (7.1) |  |  | 3 (5.5) | 5 (10.0) |  |
| Bachelor’s degree | 62 (59.0) | 26 (66.7) | 36 (54.5) |  |  | 16 (80.0) | 46 (54.1) |  |  | 36 (65.5) | 26 (52.0) |  |
| Graduate degree | 22 (21.0) | 7 (17.9) | 15 (22.7) |  |  | 2 (10.0) | 20 (23.5) |  |  | 7 (12.7) | 15 (30.0) |  |
| Exercise (≥3/week): n (%) | 26 (22.9) | 12 (36.4) | 14 (16.7) | 0.000 |  | 13 (65.0) | 53 (62.4) | 1.000 |  | 35 (63.6) | 31 (62.0) | 1.000 |
| Smoking: n (%) | 5 (4.8) | 2 (5.1) | 3 (4.5) | 1.000 |  | 2 (10.0) | 3 (3.5) | 0.523 |  | 3 (5.5) | 2 (4.0) | 1.000 |
| Alcohol: n (%) | 31 (29.5) | 9 (23.1) | 22 (33.3) | 0.372 |  | 8 (40.0) | 23 (27.1) | 0.385 |  | 14 (25.5) | 17 (34.0) | 0.457 |
| Self ﻿rated health: n (%) |  |  |  | <0.001 |  |  |  | 0.147 |  |  |  | 0.160 |
| Good | 61 (58.1) | 30 (76.9) | 31 (47.0) |  |  | 15 (75.0) | 46 (54.1) |  |  | 36 (65.5) | 25 (50.0) |  |
| Pain duration (y): mean (SD) | 5.0 (5.8) | 4.7 (5.0) | 5.2 (6.2) | 0.695 |  | 4.1 (5.1) | 5.2 (5.9) | 0.460 |  | 6.0 (6.2) | 3.8 (5.0) | 0.051 |
| Sick leave due to pain: n (%) | 64 (62.9) | 23 (53.3) | 41 (66.6) | 0.485 |  | 8 (40.0) | 16 (18.8) | 0.083 |  | 14 (25.5) | 10 (20.0) | 0.666 |
| PPT(N): mean (SD) | 25.3 (11.1) | 23.7 (10.7) | 26.2 (11.4) | 0.284 |  | 24.7 (11.3) | 25.4 (11.2) | 0.807 |  | 25.1 (9.9) | 25.4 (12.4) | 0.884 |
| Pain medicine use: n (%) | 6 (14.3) | 6 (15.4) | 9 (13.6) | 1.000 |  | 1 (5.0) | 14 (16.5) | 0.335 |  | 9 (16.4) | 6 (12.0) | 0.720 |
| Pain intensity (NRS): mean (SD) | 5.5 (1.4) | 5.8 (1.4) | 5.3 (1.4) | 0.066 |  | 5.7 (1.3) | 5.5 (1.4) | 0.468 |  | 5.8 (1.6) | 5.2 (2.1) | 0.038 |
| Pain interference (BPI): mean (SD) | 2.7 (1.9) | 3.9 (2.1) | 2.0 (1.5) | 0.005 |  | 4.3 (2.1) | 2.3 (1.7) | <0.001 |  | 3.3 (2.0) | 2.0 (1.7) | <0.001 |
| Pain diagnoses: n (%) |  |  |  |  |  |  |  |  |  |  |  |  |
| Neck pain | 42 (40.0) | 17 (43.6) | 25 (37.9) | 0.711 |  | 8 (40.0) | 34 (40.0) | 1.000 |  | 23 (41.8) | 19 (38.0) | 0.842 |
| Low back pain | 60 (57.1) | 22 (56.4) | 38 (57.6) | 1.000 |  | 13 (65.0) | 47 (55.3) | 0.591 |  | 35 (63.6) | 25 (50.0) | 0.225 |
| Knee pain | 13 (12.4) | 2 (5.1) | 11 (16.7) | 0.153 |  | 2 (10.0) | 11 (12.9) | 1.000 |  | 3 (5.5) | 10 (20.0) | 0.050 |
| Depression (PHQ-9): mean (SD) | 4.3 (3.7) | 8.0 (3.3) | 2.2 (1.5) | <0.001 |  | 8.4 (4.5) | 3.4 (2.7) | <0.001 |  | 5.6 (4.2) | 3.0 (2.4) | <0.001 |
| Anxiety (GAD-7): mean (SD) | 2.8 (3.2) | 5.1 (3.5) | 1.4 (2.0) | <0.001 |  | 8.3 (2.4) | 1.5 (1.6) | <0.001 |  | 3.5 (3.6) | 2.0 (2.4) | 0.015 |
| Sleep (PISQ): mean (SD) | 6.1 (3.2) | 7.7 (3.6) | 5.2 (2.6) | <0.001 |  | 7.5 (4.0) | 5.8 (3.0) | 0.038 |  | 8.5 (2.5) | 3.5 (1.3) | <0.001 |
| Human personality (NEO-FFI) mean (SD): |  |  |  |  |  |  |  |  |  |  |  |  |
| Extraversion | 60.8 (6.9) | 58.9 (6.2) | 61.9 (6.9) | 0.028 |  | 57.3 (6.8) | 61.6 (6.7) | 0.011 |  | 58.1 (6.1) | 63.7 (6.6) | <0.001 |
| Openness | 39.9 (6.0) | 40.0 (6.1) | 39.8 (6.0) | 0.879 |  | 41.0 (7.8) | 39.6 (5.5) | 0.369 |  | 38.5 (5.2) | 41.4 (6.5) | 0.014 |
| Conscientiousness | 44.8 (6.7) | 42.8 (7.6) | 45.7 (5.8) | 0.036 |  | 42.9 (8.1) | 45.0 (6.3) | 0.199 |  | 43.3 (6.3) | 46.1 (6.8) | 0.026 |
| Agreeableness | 41.4 (5.7) | 41.1 (6.2) | 42.1 (5.5) | 0.362 |  | 40.1 (6.4) | 42.1 (5.4) | 0.154 |  | 42.1 (5.2) | 41.3 (6.3) | 0.494 |
| Neuroticism | 29.9 (7.7) | 34.2 (8.6) | 27.4 (6.3) | <0.001 |  | 36.5 (8.9) | 28.4 (6.6) | <0.001 |  | 31.2 (7.2) | 28.5 (8.1) | 0.070 |

PPT, pain pressure threshold; BMI: body mass index. NRS: numerical rating scale. BPI: Brief Pain Inventory. PHQ-9, Patient Health Questionnaire-9; GAD-7, Generalized Anxiety Disorder Scale-7; PSQI, Pittsburgh Sleep Quality Index; NEO-FFI, Neuroticism Extraversion Openness Five-Factor Inventory. Differences between the depression, anxiety, and sleep disturbance and non- depression, anxiety, and sleep disturbance groups were examined by chi-square test for categorical variables and Student's t-test or Mann-Whitney test for continuous variables. Depression was defined using the PHQ-9 cutoff of 5 or higher; anxiety was defined using the GAD-7 cutoff of 5 or higher; sleep disturbance was defined as a total PSQI score of > 5.

**Center 9**

| **Measure** | **Total**  **(n=154)** | **Depression** | | |  | **Anxiety** | | |  | **Sleep disturbance** | | |
| --- | --- | --- | --- | --- | --- | --- | --- | --- | --- | --- | --- | --- |
| **Depression**  **(n=60)** | **Non-depression**  **(n=94)** | **p-value** |  | **Anxiety**  **(n=32)** | **Non-anxiety**  **(n=122)** | **p-value** |  | **Sleep disturbance**  **(n=76)** | **Normal sleep**  **(n=78)** | **p-value** |
| Age(y): mean (SD) | 35.8 (13.5) | 35.6 (13.2) | 35.9 (13.8) | 0.898 |  | 33.9 (11.5) | 36.3 (14.0) | 0.369 |  | 37.4 (14.7) | 34.2 (12.2) | 0.140 |
| Female: n (%) | 102 (66.2) | 38 (63.3) | 64 (68.1) | 0.665 |  | 21 (65.6) | 81 (66.4) | 1.000 |  | 48 (63.2) | 54 (69.2) | 0.531 |
| ﻿﻿BMI (kg/m2), mean (SD) | 22.9 (3.2) | 22.6 (3.1) | 23.0 (3.4) | 0.465 |  | 22.8 (3.0) | 22.9 (3.3) | 0.836 |  | 22.9 (3.1) | 22.9 (3.4) | 0.995 |
| Education: n (%) |  |  |  | 0.170 |  |  |  | 0.945 |  |  |  | 0.585 |
| High school less | 13 (8.4) | 3 (5.0) | 10 (10.6) |  |  | 3 (9.4) | 10 (8.2) |  |  | 7 (9.2) | 6 (7.7) |  |
| High school | 7 (4.5) | 4 (6.7) | 3 (3.2) |  |  | 1 (3.1) | 6 (4.9) |  |  | 4 (5.3) | 3 (3.8) |  |
| Bachelor’s degree | 77 (50.0) | 35 (58.3) | 42 (44.7) |  |  | 17 (53.1) | 60 (49.2) |  |  | 41 (53.9) | 36 (46.2) |  |
| Graduate degree | 57 (37.0) | 18 (30.0) | 39 (41.5) |  |  | 11 (34.4) | 46 (37.7) |  |  | 24 (31.6) | 33 (42.3) |  |
| Exercise (≥3/week): n (%) | 65 (42.2) | 26 (43.3) | 39 (41.5) | 0.953 |  | 9 (28.1) | 56 (45.9) | 0.107 |  | 33 (43.4) | 32 (41.0) | 0.890 |
| Smoking: n (%) | 15 (9.7) | 7 (11.7) | 8 (8.5) | 0.715 |  | 3 (9.4) | 12 (9.8) | 1.000 |  | 8 (10.5) | 7 (9.0) | 0.958 |
| Alcohol: n (%) | 41 (26.6) | 20 (33.3) | 21 (22.3) | 0.187 |  | 12 (37.5) | 29 (23.8) | 0.180 |  | 23 (30.3) | 18 (23.1) | 0.409 |
| Self ﻿rated health: n (%) |  |  |  | 0.243 |  |  |  | 0.004 |  |  |  | 0.004 |
| Good | 78 (50.6) | 32 (53.3) | 46 (49.0) |  |  | 24 (75.0) | 54 (44.3) |  |  | 48 (63.2) | 30 (38.5) |  |
| Pain duration (y): mean (SD) | 4.6 (4.3) | 4.7 (4.0) | 4.6 (4.4) | 0.930 |  | 4.8 (4.2) | 4.6 (4.3) | 0.867 |  | 4.9 (4.6) | 4.4 (3.9) | 0.425 |
| Sick leave due to pain: n (%) | 38 (24.7) | 17 (28.3) | 21 (22.3) | 0.516 |  | 12 (37.5) | 26 (21.3) | 0.097 |  | 18 (23.7) | 20 (25.6) | 0.925 |
| PPT(N): mean (SD) | 19.1 (6.7) | 18.3 (6.3) | 19.7 (6.9) | 0.226 |  | 18.5 (8.0) | 19.3 (6.9) | 0.516 |  | 19.1 (7.0) | 19.2 (6.4) | 0.981 |
| Pain medicine use: n (%) | 13 (8.4) | 7 (11.7) | 6 (6.4) | 0.394 |  | 2 (6.2) | 11 (9.0) | 0.886 |  | 8 (10.5) | 5 (6.4) | 0.530 |
| Pain intensity (NRS): mean (SD) | 5.3 (1.3) | 5.4 (1.4) | 5.2 (1.3) | 0.298 |  | 5.5 (1.4) | 5.2 (1.3) | 0.253 |  | 5.3 (1.3) | 5.2 (1.4) | 0.608 |
| Pain interference (BPI): mean (SD) | 2.8 (2.0) | 3.7 (2.2) | 2.2 (1.6) | <0.001 |  | 4.2 (1.9) | 2.4 (1.8) | <0.001 |  | 3.3 (2.1) | 2.3 (1.8) | 0.002 |
| Pain diagnoses: n (%) |  |  |  |  |  |  |  |  |  |  |  |  |
| Neck pain | 89 (57.8) | 38 (63.3) | 51 (54.3) | 0.345 |  | 25 (78.1) | 64 (52.5) | 0.016 |  | 41 (53.9) | 48 (61.5) | 0.429 |
| Low back pain | 94 (61.0) | 38 (63.3) | 56 (59.6) | 0.766 |  | 18 (56.2) | 76 (62.3) | 0.674 |  | 52 (68.4) | 42 (53.8) | 0.091 |
| Knee pain | 14 (9.1) | 5 (8.3) | 9 (9.6) | 1.000 |  | 1 (3.1) | 13 (10.7) | 0.330 |  | 7 (9.2) | 7 (9.0) | 1.000 |
| Depression (PHQ-9): mean (SD) | 4.8 (4.2) | 8.9 (3.9) | 2.2 (1.4) | <0.001 |  | 10.0 (5.1) | 3.5 (2.7) | <0.001 |  | 6.6 (4.7) | 3.1 (2.8) | <0.001 |
| Anxiety (GAD-7): mean (SD) | 3.3 (3.7) | 6.0 (4.2) | 1.5 (1.8) | <0.001 |  | 9.0 (3.7) | 1.8 (1.6) | <0.001 |  | 4.7 (4.3) | 1.9 (2.2) | <0.001 |
| Sleep (PISQ): mean (SD) | 5.8 (3.1) | 7.8 (3.4) | 4.6 (2.1) | <0.001 |  | 8.0 (3.3) | 5.2 (2.8) | <0.001 |  | 8.2 (2.6) | 3.5 (1.2) | <0.001 |
| Human personality (NEO-FFI) mean (SD): |  |  |  |  |  |  |  |  |  |  |  |  |
| Extraversion | 59.8 (6.3) | 57.9 (6.8) | 60.9 (5.6) | 0.003 |  | 55.6 (5.9) | 60.9 (5.9) | <0.001 |  | 59.0 (6.2) | 60.5 (6.3) | 0.118 |
| Openness | 41.0 (5.8) | 42.0 (6.4) | 40.3 (5.3) | 0.062 |  | 42.8 (6.7) | 40.5 (5.5) | 0.042 |  | 40.8 (6.1) | 41.2 (5.5) | 0.709 |
| Conscientiousness | 44.5 (6.4) | 42.6 (7.1) | 45.7 (5.5) | 0.003 |  | 41.4 (6.6) | 45.3 (6.1) | 0.002 |  | 44.2 (6.2) | 44.8 (6.6) | 0.597 |
| Agreeableness | 40.7 (4.4) | 40.1 (5.1) | 41.1 (4.7) | 0.185 |  | 38.2 (5.2) | 41.3 (4.6) | 0.001 |  | 40.4 (5.5) | 40.9 (4.1) | 0.500 |
| Neuroticism | 31.5 (8.2) | 36.5 (7.8) | 28.4 (6.7) | <0.001 |  | 40.6 (6.2) | 29.2 (6.9) | <0.001 |  | 33.9 (8.5) | 29.2 (7.4) | <0.001 |

PPT, pain pressure threshold; BMI: body mass index. NRS: numerical rating scale. BPI: Brief Pain Inventory. PHQ-9, Patient Health Questionnaire-9; GAD-7, Generalized Anxiety Disorder Scale-7; PSQI, Pittsburgh Sleep Quality Index; NEO-FFI, Neuroticism Extraversion Openness Five-Factor Inventory. Differences between the depression, anxiety, and sleep disturbance and non- depression, anxiety, and sleep disturbance groups were examined by chi-square test for categorical variables and Student's t-test or Mann-Whitney test for continuous variables. Depression was defined using the PHQ-9 cutoff of 5 or higher; anxiety was defined using the GAD-7 cutoff of 5 or higher; sleep disturbance was defined as a total PSQI score of > 5.

**Center 10**

| **Measure** | **Total**  **(n=47)** | **Depression** | | |  | **Anxiety** | | |  | **Sleep disturbance** | | |
| --- | --- | --- | --- | --- | --- | --- | --- | --- | --- | --- | --- | --- |
| **Depression**  **(n=18)** | **Non-depression**  **(n=29)** | **p-value** |  | **Anxiety**  **(n=5)** | **Non-anxiety**  **(n=42)** | **p-value** |  | **Sleep disturbance**  **(n=20)** | **Normal sleep**  **(n=27)** | **p-value** |
| Age(y): mean (SD) | 42.7 (14.5) | 39.8 (13.1) | 44.5 (15.2) | 0.287 |  | 44.6 (12.6) | 42.4 (14.8) | 0.755 |  | 40.7 (13.5) | 44.2 (15.2) | 0.418 |
| Female: n (%) | 30 (63.8) | 14 (77.8) | 16 (55.2) | 0.209 |  | 3 (60.0) | 27 (64.3) | 1.000 |  | 13 (65.0) | 17 (63.0) | 1.000 |
| ﻿﻿BMI (kg/m2), mean (SD) | 22.8 (3.3) | 23.3 (3.2) | 22.5 (3.4) | 0.423 |  | 23.7 (3.9) | 22.7 (3.2) | 0.513 |  | 22.9 (3.5) | 22.7 (3.1) | 0.867 |
| Education: n (%) |  |  |  | 0.092 |  |  |  | 0.313 |  |  |  | 0.562 |
| High school less | 13 (27.7) | 4 (22.2) | 9 (31.0) |  |  | 2 (40.0) | 11 (26.2) |  |  | 5 (25.0) | 8 (29.6) |  |
| High school | 7 (14.9) | 2 (11.1) | 5 (17.2) |  |  | 0 (0.0) | 7 (16.7) |  |  | 2 (10.0) | 5 (18.5) |  |
| Bachelor’s degree | 16 (34.0) | 10 (55.6) | 6 (20.7) |  |  | 3 (60.0) | 13 (31.0) |  |  | 9 (45.0) | 7 (25.9) |  |
| Graduate degree | 11 (23.4) | 2 (11.1) | 9 (31.0) |  |  | 0 (0.0) | 11 (26.2) |  |  | 4 (20.0) | 7 (25.9) |  |
| Exercise (≥3/week): n (%) | 29 (61.7) | 12 (66.7) | 17 (58.6) | 0.808 |  | 5 (100.0) | 24 (57.1) | 0.169 |  | 13 (65.0) | 16 (59.3) | 0.923 |
| Smoking: n (%) | 1 (2.1) | 0 (0.0) | 1 (3.4) | 1.000 |  | 0 (0.0) | 1 (2.4) | 1.000 |  | 1 (5.0) | 0 (0.0) | 0.879 |
| Alcohol: n (%) | 10 (21.3) | 3 (16.7) | 7 (24.1) | 0.809 |  | 0 (0.0) | 10 (23.8) | 0.515 |  | 5 (25.0) | 5 (18.5) | 0.860 |
| Self ﻿rated health: n (%) |  |  |  | 0.743 |  |  |  | 0.800 |  |  |  | 0.796 |
| Good | 26 (55.3) | 11 (61.1) | 15 (51.7) |  |  | 2 (40.0) | 24 (57.1) |  |  | 12 (60.0) | 14 (51.9) |  |
| Pain duration (y): mean (SD) | 3.6 (4.3) | 2.9 (2.5) | 4.0 (4.8) | 0.349 |  | 5.2 (4.8) | 3.4 (4.0) | 0.365 |  | 3.7 (4.0) | 3.5 (4.2) | 0.823 |
| Sick leave due to pain: n (%) | 9 (19.1) | 5 (27.8) | 4 (13.8) | 0.422 |  | 0 (0.0) | 9 (21.4) | 0.582 |  | 5 (25.0) | 4 (14.8) | 0.615 |
| PPT(N): mean (SD) | 33.2 (9.7) | 36.6 (11.9) | 31.1 (7.5) | 0.054 |  | 32.6 (7.5) | 33.3 (10.0) | 0.894 |  | 34.5 (11.6) | 32.2 (8.1) | 0.429 |
| Pain medicine use: n (%) | 1 (2.1) | 1 (5.6) | 0 (0.0) | 0.808 |  | 0 (0.0) | 1 (2.4) | 1.000 |  | 1 (5.0) | 0 (0.0) | 0.879 |
| Pain intensity (NRS): mean (SD) | 6.4 (1.4) | 6.7 (1.6) | 6.2 (1.3) | 0.201 |  | 6.2 (0.8) | 6.4 (1.5) | 0.765 |  | 6.4 (1.7) | 6.4 (1.2) | 0.945 |
| Pain interference (BPI): mean (SD) | 2.0 (1.5) | 2.4 (1.8) | 1.7 (1.2) | 0.123 |  | 4.4 (1.7) | 1.7 (1.2) | <0.001 |  | 2.7 (1.8) | 1.6 (1.1) | 0.011 |
| Pain diagnoses: n (%) |  |  |  |  |  |  |  |  |  |  |  |  |
| Neck pain | 27 (57.4) | 14 (77.8) | 13 (44.8) | 0.055 |  | 4 (80.0) | 23 (54.8) | 0.548 |  | 12 (60.0) | 15 (55.6) | 0.995 |
| Low back pain | 20 (42.6) | 5 (27.8) | 15 (51.7) | 0.190 |  | 3 (60.0) | 17 (40.5) | 0.722 |  | 9 (45.0) | 11 (40.7) | 1.000 |
| Knee pain | 5 (10.6) | 0 (0.0) | 5 (17.2) | 0.169 |  | 0 (0.0) | 5 (11.9) | 0.961 |  | 1 (5.0) | 4 (14.8) | 0.548 |
| Depression (PHQ-9): mean (SD) | 4.4 (3.9) | 7.4 (2.8) | 2.5 (1.5) | <0.001 |  | 9.6 (4.0) | 3.8 (2.5) | <0.001 |  | 6.6 (3.4) | 2.8 (1.9) | <0.001 |
| Anxiety (GAD-7): mean (SD) | 2.5 (3.7) | 4.8 (3.6) | 1.5 (1.6) | 0.014 |  | 11.2 (6.9) | 1.5 (1.5) | <0.001 |  | 4.0 (3.4) | 1.4 (1.7) | 0.024 |
| Sleep (PISQ): mean (SD) | 5.2 (3.7) | 7.3 (5.7) | 3.5 (2.3) | <0.001 |  | 8.2 (6.2) | 4.1 (3.1) | 0.045 |  | 8.3 (3.1) | 2.9 (1.7) | <0.001 |
| Human personality (NEO-FFI) mean (SD): |  |  |  |  |  |  |  |  |  |  |  |  |
| Extraversion | 59.8 (6.3) | 58.1 (4.4) | 60.8 (7.1) | 0.150 |  | 55.8 (4.4) | 60.3 (6.3) | 0.133 |  | 58.8 (5.4) | 60.6 (6.8) | 0.333 |
| Openness | 38.3 (5.4) | 39.0 (5.1) | 38.1 (4.8) | 0.603 |  | 36.0 (3.5) | 38.8 (5.6) | 0.289 |  | 39.8 (5.2) | 37.6 (4.8) | 0.224 |
| Conscientiousness | 41.7 (6.9) | 39.9 (6.6) | 42.8 (6.9) | 0.155 |  | 38.8 (9.1) | 42.1 (6.6) | 0.322 |  | 40.5 (6.9) | 42.6 (6.8) | 0.286 |
| Agreeableness | 39.5 (4.3) | 39.2 (5.1) | 39.4 (4.2) | 0.884 |  | 39.4 (2.6) | 39.3 (4.5) | 0.974 |  | 39.5 (3.7) | 39.2 (4.8) | 0.830 |
| Neuroticism | 31.7 (8.2) | 34.4 (8.4) | 30.1 (7.7) | 0.074 |  | 37.2 (7.8) | 31.8 (8.1) | 0.115 |  | 33.6 (8.5) | 30.4 (7.8) | 0.183 |

PPT, pain pressure threshold; BMI: body mass index. NRS: numerical rating scale. BPI: Brief Pain Inventory. PHQ-9, Patient Health Questionnaire-9; GAD-7, Generalized Anxiety Disorder Scale-7; PSQI, Pittsburgh Sleep Quality Index; NEO-FFI, Neuroticism Extraversion Openness Five-Factor Inventory. Differences between the depression, anxiety, and sleep disturbance and non- depression, anxiety, and sleep disturbance groups were examined by chi-square test for categorical variables and Student's t-test or Mann-Whitney test for continuous variables. Depression was defined using the PHQ-9 cutoff of 5 or higher; anxiety was defined using the GAD-7 cutoff of 5 or higher; sleep disturbance was defined as a total PSQI score of > 5.

**Center 11**

| **Measure** | **Total**  **(n=102)** | **Depression** | | |  | **Anxiety** | | |  | **Sleep disturbance** | | |
| --- | --- | --- | --- | --- | --- | --- | --- | --- | --- | --- | --- | --- |
| **Depression**  **(n=24)** | **Non-depression**  **(n=78)** | **p-value** |  | **Anxiety**  **(n=13)** | **Non-anxiety**  **(n=89)** | **p-value** |  | **Sleep disturbance**  **(n=46)** | **Normal sleep**  **(n=61)** | **p-value** |
| Age(y): mean (SD) | 39.0 (13.5) | 40.9 (13.6) | 38.4 (13.5) | 0.432 |  | 34.8 (10.3) | 39.6 (13.8) | 0.231 |  | 40.9 (14.7) | 37.7 (12.6) | 0.250 |
| Female: n (%) | 54 (52.9) | 19 (79.2) | 35 (44.9) | 0.007 |  | 11 (84.6) | 43 (48.3) | 0.031 |  | 27 (65.9) | 27 (44.3) | 0.052 |
| ﻿﻿BMI (kg/m2), mean (SD) | 22.6 (3.6) | 21.6 (2.0) | 22.9 (3.9) | 0.117 |  | 21.7 (2.4) | 22.7 (3.7) | 0.350 |  | 21.9 (3.6) | 23.0 (3.5) | 0.108 |
| Education: n (%) |  |  |  | 0.074 |  |  |  | 0.656 |  |  |  | 0.040 |
| High school less | 26 (25.5) | 11 (45.8) | 15 (19.2) |  |  | 5 (38.5) | 21 (23.6) |  |  | 15 (36.6) | 11 (18.0) |  |
| High school | 14 (13.7) | 2 (8.3) | 12 (15.4) |  |  | 1 (7.7) | 13 (14.6) |  |  | 8 (19.5) | 6 (9.8) |  |
| Bachelor’s degree | 50 (49.0) | 9 (37.5) | 41 (52.6) |  |  | 6 (46.2) | 44 (49.4) |  |  | 14 (34.1) | 36 (59.0) |  |
| Graduate degree | 12 (11.8) | 2 (8.3) | 10 (12.8) |  |  | 1 (7.7) | 11 (12.4) |  |  | 4 (9.8) | 8 (13.1) |  |
| Exercise (≥3/week): n (%) | 32 (31.4) | 6 (25.0) | 26 (33.3) | 0.988 |  | 4 (30.8) | 28 (31.5) | 1.000 |  | 13 (31.7) | 19 (31.1) | 1.000 |
| Smoking: n (%) | 17 (16.7) | 2 (8.3) | 15 (19.2) | 0.347 |  | 1 (7.7) | 16 (18.0) | 0.595 |  | 6 (14.6) | 11 (18.0) | 0.857 |
| Alcohol: n (%) | 21 (20.6) | 2 (8.3) | 19 (24.4) | 0.159 |  | 1 (7.7) | 20 (22.5) | 0.388 |  | 7 (17.1) | 14 (23.0) | 0.638 |
| Self ﻿rated health: n (%) |  |  |  | 0.945 |  |  |  | 1.000 |  |  |  | 0.740 |
| Good | 58 (56.9) | 13 (54.2) | 45 (57.7) |  |  | 7 (53.8) | 51 (57.3) |  |  | 22 (53.7) | 36 (59.0) |  |
| Pain duration (y): mean (SD) | 3.2 (4.7) | 1.9 (1.7) | 3.6 (5.3) | 0.122 |  | 1.1 (0.5) | 3.5 (5.0) | 0.091 |  | 2.5 (3.5) | 3.7 (5.4) | 0.246 |
| Sick leave due to pain: n (%) | 12 (11.8) | 6 (25.0) | 6 (7.7) | 0.052 |  | 4 (30.8) | 8 (9.0) | 0.069 |  | 8 (19.5) | 4 (6.6) | 0.093 |
| PPT(N): mean (SD) | 24.3 (4.1) | 24.4 (3.0) | 24.3 (4.4) | 0.920 |  | 23.2 (2.7) | 24.4 (10.2) | 0.325 |  | 24.9 (9.6) | 23.9 (10.7) | 0.220 |
| Pain medicine use: n (%) | 102 (100.0) | 24 (100.0) | 78 (100.0) | NA |  | 13 (100.0) | 89 (100.0) | NA |  | 41 (100.0) | 61 (100.0) | NA |
| Pain intensity (NRS): mean (SD) | 6.6 (1.4) | 7.2 (1.0) | 6.4 (1.4) | 0.009 |  | 7.0 (1.1) | 6.5 (1.4) | 0.233 |  | 6.8 (1.3) | 6.4 (1.4) | 0.208 |
| Pain interference (BPI): mean (SD) | 3.7 (1.4) | 4.7 (1.4) | 3.4 (1.3) | <0.001 |  | 5.0 (1.3) | 3.6 (1.3) | <0.001 |  | 4.2 (1.8) | 3.4 (1.0) | 0.005 |
| Pain diagnoses: n (%) |  |  |  |  |  |  |  |  |  |  |  |  |
| Neck pain | 40 (39.2) | 9 (37.5) | 31 (39.7) | 1.000 |  | 6 (46.2) | 34 (38.2) | 0.807 |  | 15 (36.6) | 25 (41.0) | 0.811 |
| Low back pain | 65 (63.7) | 15 (62.5) | 50 (64.1) | 1.000 |  | 7 (53.8) | 58 (65.2) | 0.628 |  | 28 (68.3) | 37 (60.7) | 0.564 |
| Knee pain | 4 (3.9) | 1 (4.2) | 3 (3.8) | 1.000 |  | 1 (7.7) | 3 (3.4) | 1.000 |  | 2 (4.9) | 2 (3.3) | 1.000 |
| Depression (PHQ-9): mean (SD) | 3.1 (2.8) | 7.3 (2.0) | 1.8 (1.2) | <0.001 |  | 7.7 (2.1) | 2.5 (2.1) | <0.001 |  | 5.2 (3.1) | 1.8 (1.2) | <0.001 |
| Anxiety (GAD-7): mean (SD) | 2.5 (2.7) | 6.5 (2.5) | 1.3 (1.3) | <0.001 |  | 8.5 (2.6) | 1.7 (1.5) | <0.001 |  | 4.5 (3.2) | 1.2 (1.1) | <0.001 |
| Sleep (PISQ): mean (SD) | 5.0 (3.3) | 8.9 (2.4) | 3.8 (2.4) | <0.001 |  | 9.4 (2.1) | 4.4 (2.9) | <0.001 |  | 8.4 (2.0) | 2.7 (1.4) | <0.001 |
| Human personality (NEO-FFI) mean (SD): |  |  |  |  |  |  |  |  |  |  |  |  |
| Extraversion | 59.6 (4.3) | 56.8 (3.9) | 60.5 (4.0) | <0.001 |  | 57.3 (2.7) | 59.9 (4.4) | 0.037 |  | 58.2 (4.8) | 60.6 (3.6) | 0.004 |
| Openness | 37.1 (4.9) | 36.4 (3.5) | 37.3 (4.7) | 0.451 |  | 35.6 (4.9) | 37.3 (4.9) | 0.250 |  | 36.3 (5.9) | 37.6 (4.0) | 0.202 |
| Conscientiousness | 39.4 (4.3) | 37.6 (4.4) | 39.9 (4.2) | 0.019 |  | 36.0 (3.3) | 39.9 (4.2) | 0.002 |  | 38.3 (4.5) | 40.1 (4.0) | 0.040 |
| Agreeableness | 38.1 (4.2) | 38.0 (4.1) | 38.1 (4.3) | 0.992 |  | 36.5 (4.6) | 38.3 (4.2) | 0.170 |  | 38.3 (4.5) | 37.9 (4.1) | 0.636 |
| Neuroticism | 33.8 (4.8) | 37.3 (3.4) | 32.8 (4.7) | <0.001 |  | 38.3 (3.7) | 33.2 (4.6) | <0.001 |  | 35.4 (4.2) | 32.8 (5.0) | 0.008 |

PPT, pain pressure threshold; BMI: body mass index. NRS: numerical rating scale. BPI: Brief Pain Inventory. PHQ-9, Patient Health Questionnaire-9; GAD-7, Generalized Anxiety Disorder Scale-7; PSQI, Pittsburgh Sleep Quality Index; NEO-FFI, Neuroticism Extraversion Openness Five-Factor Inventory. Differences between the depression, anxiety, and sleep disturbance and non- depression, anxiety, and sleep disturbance groups were examined by chi-square test for categorical variables and Student's t-test or Mann-Whitney test for continuous variables. Depression was defined using the PHQ-9 cutoff of 5 or higher; anxiety was defined using the GAD-7 cutoff of 5 or higher; sleep disturbance was defined as a total PSQI score of > 5.

**Center 12**

| **Measure** | **Total**  **(n=77)** | **Depression** | | |  | **Anxiety** | | |  | **Sleep disturbance** | | |
| --- | --- | --- | --- | --- | --- | --- | --- | --- | --- | --- | --- | --- |
| **Depression**  **(n=20)** | **Non-depression**  **(n=57)** | **p-value** |  | **Anxiety**  **(n=15)** | **Non-anxiety**  **(n=62)** | **p-value** |  | **Sleep disturbance**  **(n=38)** | **Normal sleep**  **(n=39)** | **p-value** |
| Age(y): mean (SD) | 39.3 (12.6) | 42.3 (14.2) | 38.2 (11.9) | 0.211 |  | 42.1 (13.5) | 38.6 (12.4) | 0.327 |  | 40.6 (13.3) | 38.0 (11.9) | 0.377 |
| Female: n (%) | 47 (61.0) | 13 (65.0) | 34 (59.6) | 0.876 |  | 12 (80.0) | 35 (56.5) | 0.167 |  | 26 (68.4) | 21 (53.8) | 0.281 |
| ﻿﻿BMI (kg/m2), mean (SD) | 23.0 (2.9) | 22.8 (2.6) | 23.1 (3.0) | 0.661 |  | 22.8 (2.8) | 23.1 (3.0) | 0.755 |  | 22.5 (3.0) | 23.5 (2.8) | 0.165 |
| Education: n (%) |  |  |  | 0.527 |  |  |  | 0.620 |  |  |  | 0.713 |
| High school less | 10 (13.0) | 4 (20.0) | 6 (10.5) |  |  | 2 (13.3) | 8 (12.9) |  |  | 5 (13.2) | 5 (12.8) |  |
| High school | 13 (16.9) | 4 (20.0) | 9 (15.8) |  |  | 3 (20.0) | 10 (16.1) |  |  | 7 (18.4) | 6 (15.4) |  |
| Bachelor’s degree | 41 (53.2) | 8 (40.0) | 33 (57.9) |  |  | 6 (40.0) | 35 (56.5) |  |  | 18 (47.4) | 23 (59.0) |  |
| Graduate degree | 13 (16.9) | 4 (20.0) | 9 (15.8) |  |  | 4 (26.7) | 9 (14.5) |  |  | 8 (21.1) | 5 (12.8) |  |
| Exercise (≥3/week): n (%) | 26 (33.8) | 5 (25.0) | 21 (36.8) | 0.491 |  | 5 (33.3) | 21 (33.9) | 1.000 |  | 13 (34.2) | 13 (33.3) | 1.000 |
| Smoking: n (%) | 9 (11.7) | 3 (15.0) | 6 (10.5) | 0.896 |  | 2 (13.3) | 7 (11.3) | 1.000 |  | 3 (7.9) | 6 (15.4) | 0.504 |
| Alcohol: n (%) | 26 (33.8) | 4 (20.0) | 22 (38.6) | 0.216 |  | 2 (13.3) | 24 (38.7) | 0.119 |  | 7 (18.4) | 19 (48.7) | 0.010 |
| Self ﻿rated health: n (%) |  |  |  | 0.406 |  |  |  | 0.446 |  |  |  | 0.724 |
| Good | 42 (54.5) | 13 (65.0) | 29 (50.9) |  |  | 10 (66.7) | 32 (51.6) |  |  | 22 (57.9) | 20 (51.3) |  |
| Pain duration (y): mean (SD) | 3.5 (4.7) | 4.4 (4.8) | 3.2 (4.7) | 0.319 |  | 6.0 (8.3) | 2.9 (3.7) | 0.019 |  | 4.4 (5.8) | 2.6 (3.1) | 0.087 |
| Sick leave due to pain: n (%) | 29 (37.7) | 7 (35.0) | 22 (38.6) | 0.986 |  | 4 (26.7) | 25 (40.3) | 0.495 |  | 15 (39.5) | 14 (35.9) | 0.929 |
| PPT(N): mean (SD) | 25.9 (6.1) | 25.5 (5.0) | 26.0 (6.5) | 0.736 |  | 24.3 (5.4) | 26.3 (6.2) | 0.258 |  | 25.4 (5.0) | 26.3 (7.1) | 0.506 |
| Pain medicine use: n (%) | 4 (5.2) | 2 (10.0) | 2 (3.5) | 0.589 |  | 1 (6.7) | 3 (4.8) | 1.000 |  | 4 (10.5) | 0 (0.0) | 0.117 |
| Pain intensity (NRS): mean (SD) | 5.3 (1.3) | 5.3 (1.2) | 5.3 (1.3) | 0.872 |  | 5.8 (1.6) | 5.1 (1.2) | 0.068 |  | 5.6 (1.3) | 4.9 (1.2) | 0.030 |
| Pain interference (BPI): mean (SD) | 3.6 (1.7) | 4.4 (1.8) | 3.3 (1.6) | 0.010 |  | 4.7 (1.8) | 3.4 (1.6) | 0.006 |  | 4.4 (2.0) | 3.0 (1.4) | 0.002 |
| Pain diagnoses: n (%) |  |  |  |  |  |  |  |  |  |  |  |  |
| Neck pain | 37 (48.1) | 12 (60.0) | 25 (43.9) | 0.326 |  | 13 (86.7) | 24 (38.7) | 0.002 |  | 23 (60.5) | 14 (35.9) | 0.053 |
| Low back pain | 41 (53.2) | 12 (60.0) | 29 (50.9) | 0.658 |  | 6 (40.0) | 35 (56.5) | 0.391 |  | 18 (47.4) | 23 (59.0) | 0.428 |
| Knee pain | 19 (24.7) | 7 (35.0) | 12 (21.1) | 0.345 |  | 5 (33.3) | 14 (22.6) | 0.594 |  | 11 (28.9) | 8 (20.5) | 0.553 |
| Depression (PHQ-9): mean (SD) | 3.5 (3.3) | 7.6 (3.5) | 2.1 (1.6) | <0.001 |  | 6.1 (3.9) | 2.9 (2.8) | 0.001 |  | 4.8 (4.0) | 2.2 (1.7) | <0.001 |
| Anxiety (GAD-7): mean (SD) | 3.3 (3.0) | 5.4 (3.3) | 2.6 (2.5) | <0.001 |  | 8.2 (2.1) | 2.5 (2.7) | <0.001 |  | 4.3 (3.5) | 2.3 (2.0) | 0.002 |
| Sleep (PISQ): mean (SD) | 5.9 (3.0) | 8.4 (2.4) | 5.1 (2.7) | <0.001 |  | 7.7 (3.7) | 5.1 (1.7) | 0.009 |  | 8.3 (2.2) | 3.6 (1.3) | <0.001 |
| Human personality (NEO-FFI) mean (SD): |  |  |  |  |  |  |  |  |  |  |  |  |
| Extraversion | 62.8 (5.8) | 60.8 (7.3) | 63.4 (5.0) | 0.078 |  | 61.3 (5.1) | 63.1 (5.9) | 0.268 |  | 60.6 (6.0) | 64.9 (4.6) | 0.001 |
| Openness | 37.6 (5.4) | 36.4 (5.9) | 38.0 (5.1) | 0.263 |  | 37.7 (4.7) | 37.5 (5.5) | 0.931 |  | 37.5 (6.0) | 38.0 (4.5) | 0.467 |
| Conscientiousness | 43.6 (5.7) | 41.3 (4.5) | 44.4 (5.9) | 0.034 |  | 41.5 (3.9) | 44.1 (6.0) | 0.113 |  | 42.5 (5.0) | 44.6 (6.3) | 0.115 |
| Agreeableness | 40.3 (4.9) | 39.9 (3.7) | 40.5 (5.2) | 0.662 |  | 40.2 (4.8) | 40.3 (4.9) | 0.922 |  | 40.2 (4.6) | 40.5 (5.2) | 0.786 |
| Neuroticism | 29.1 (6.3) | 32.4 (6.4) | 28.0 (6.0) | 0.007 |  | 33.4 (6.7) | 28.1 (5.9) | 0.003 |  | 31.8 (5.6) | 26.6 (6.0) | <0.001 |

PPT, pain pressure threshold; BMI: body mass index. NRS: numerical rating scale. BPI: Brief Pain Inventory. PHQ-9, Patient Health Questionnaire-9; GAD-7, Generalized Anxiety Disorder Scale-7; PSQI, Pittsburgh Sleep Quality Index; NEO-FFI, Neuroticism Extraversion Openness Five-Factor Inventory. Differences between the depression, anxiety, and sleep disturbance and non- depression, anxiety, and sleep disturbance groups were examined by chi-square test for categorical variables and Student's t-test or Mann-Whitney test for continuous variables. Depression was defined using the PHQ-9 cutoff of 5 or higher; anxiety was defined using the GAD-7 cutoff of 5 or higher; sleep disturbance was defined as a total PSQI score of > 5.

**Center 13**

| **Measure** | **Total**  **(n=73)** | **Depression** | | |  | **Anxiety** | | |  | **Sleep disturbance** | | |
| --- | --- | --- | --- | --- | --- | --- | --- | --- | --- | --- | --- | --- |
| **Depression**  **(n=30)** | **Non-depression**  **(n=43)** | **p-value** |  | **Anxiety**  **(n=19)** | **Non-anxiety**  **(n=54)** | **p-value** |  | **Sleep disturbance**  **(n=48)** | **Normal sleep**  **(n=25)** | **p-value** |
| Age(y): mean (SD) | 45.2 (12.8) | 42.2 (13.5) | 47.3 (12.1) | 0.095 |  | 41.0 (13.4) | 46.6 (12.4) | 0.100 |  | 44.2 (13.1) | 47.1 (12.4) | 0.350 |
| Female: n (%) | 52 (71.2) | 22 (73.3) | 30 (69.8) | 0.945 |  | 14 (73.7) | 38 (70.4) | 1.000 |  | 35 (72.9) | 17 (68.0) | 0.867 |
| ﻿﻿BMI (kg/m2), mean (SD) | 24.4 (3.5) | 24.7 (4.3) | 24.2 (2.9) | 0.488 |  | 23.5 (4.2) | 24.7 (3.2) | 0.195 |  | 24.4 (3.2) | 23.6 (2.9) | 0.124 |
| Education: n (%) |  |  |  | 0.660 |  |  |  | 0.201 |  |  |  | 0.818 |
| High school less | 5 (6.8) | 1 (3.3) | 4 (9.3) |  |  | 0 (0.0) | 5 (9.3) |  |  | 4 (8.3) | 1 (4.0) |  |
| High school | 18 (24.7) | 9 (30.0) | 9 (20.9) |  |  | 3 (15.8) | 15 (27.8) |  |  | 12 (25.0) | 6 (24.0) |  |
| Bachelor’s degree | 36 (49.3) | 14 (46.7) | 22 (51.2) |  |  | 13 (68.4) | 23 (42.6) |  |  | 24 (50.0) | 12 (48.0) |  |
| Graduate degree | 14 (19.2) | 6 (20.0) | 8 (18.6) |  |  | 3 (15.8) | 11 (20.4) |  |  | 8 (16.7) | 6 (24.0) |  |
| Exercise (≥3/week): n (%) | 31 (42.5) | 9 (30.0) | 22 (51.2) | 0.119 |  | 6 (31.6) | 25 (46.3) | 0.397 |  | 16 (33.3) | 15 (60.0) | 0.053 |
| Smoking: n (%) | 8 (11.0) | 2 (6.7) | 6 (14.0) | 0.549 |  | 2 (10.5) | 6 (11.1) | 1.000 |  | 6 (12.5) | 2 (8.0) | 0.850 |
| Alcohol: n (%) | 30 (41.1) | 13 (43.3) | 17 (39.5) | 0.934 |  | 10 (52.6) | 20 (37.0) | 0.359 |  | 23 (47.9) | 7 (28.0) | 0.164 |
| Self ﻿rated health: n (%) |  |  |  | <0.001 |  |  |  | 0.672 |  |  |  | 0.501 |
| Good | 49 (67.1) | 28 (93.3) | 21 (48.8) |  |  | 14 (73.7) | 35 (64.8) |  |  | 34 (70.8) | 15 (60.0) |  |
| Pain duration (y): mean (SD) | 5.0 (5.1) | 5.6 (5.6) | 4.6 (4.6) | 0.415 |  | 6.0 (5.7) | 4.6 (4.8) | 0.326 |  | 5.1 (5.2) | 4.7 (4.9) | 0.733 |
| Sick leave due to pain: n (%) | 20 (27.4) | 13 (43.3) | 7 (16.3) | 0.022 |  | 7 (36.8) | 13 (24.1) | 0.439 |  | 15 (31.3) | 5 (20.0) | 0.456 |
| PPT(N): mean (SD) | 27.7 (10.9) | 27.8 (11.3) | 27.7 (10.8) | 0.979 |  | 28.4 (15.5) | 27.5 (11.8) | 0.779 |  | 27.6 (12.6) | 27.3 (10.4) | 0.936 |
| Pain medicine use: n (%) | 9 (12.3) | 5 (16.7) | 4 (9.3) | 0.562 |  | 3 (15.8) | 6 (11.1) | 0.898 |  | 6 (12.5) | 3 (12.0) | 1.000 |
| Pain intensity (NRS): mean (SD) | 5.7 (1.5) | 5.8 (1.6) | 5.7 (1.4) | 0.723 |  | 5.7 (1.3) | 5.7 (1.6) | 0.887 |  | 5.8 (1.5) | 5.7 (1.5) | 0.849 |
| Pain interference (BPI): mean (SD) | 3.1 (1.9) | 3.4 (1.7) | 3.0 (2.0) | 0.369 |  | 4.0 (2.1) | 2.9 (1.7) | 0.025 |  | 3.4 (1.8) | 2.4 (2.0) | 0.057 |
| Pain diagnoses: n (%) |  |  |  |  |  |  |  |  |  |  |  |  |
| Neck pain | 37 (50.7) | 18 (60.0) | 19 (44.2) | 0.275 |  | 13 (68.4) | 24 (44.4) | 0.126 |  | 24 (50.0) | 13 (52.0) | 1.000 |
| Low back pain | 40 (54.8) | 20 (66.7) | 20 (46.5) | 0.143 |  | 8 (42.1) | 32 (59.3) | 0.306 |  | 31 (64.6) | 9 (36.0) | 0.037 |
| Knee pain | 34 (46.6) | 12 (40.0) | 22 (51.2) | 0.483 |  | 8 (42.1) | 26 (48.1) | 0.852 |  | 22 (45.8) | 12 (48.0) | 1.000 |
| Depression (PHQ-9): mean (SD) | 4.8 (4.7) | 8.6 (5.0) | 2.1 (1.5) | <0.001 |  | 7.5 (7.1) | 3.8 (3.0) | 0.002 |  | 3.9 (4.4) | 3.7 (2.9) | 0.115 |
| Anxiety (GAD-7): mean (SD) | 3.7 (3.7) | 5.5 (3.9) | 2.4 (2.9) | <0.001 |  | 8.6 (2.9) | 2.0 (1.9) | <0.001 |  | 4.2 (3.6) | 2.8 (3.6) | 0.119 |
| Sleep (PISQ): mean (SD) | 7.4 (3.7) | 9.2 (3.7) | 6.2 (3.3) | <0.001 |  | 8.1 (3.2) | 7.2 (3.9) | 0.340 |  | 9.3 (3.0) | 3.7 (1.9) | <0.001 |
| Human personality (NEO-FFI) mean (SD): |  |  |  |  |  |  |  |  |  |  |  |  |
| Extraversion | 60.0 (6.5) | 57.9 (6.2) | 61.4 (6.6) | 0.023 |  | 60.2 (6.1) | 59.9 (6.7) | 0.863 |  | 59.3 (7.1) | 61.4 (5.9) | 0.196 |
| Openness | 39.8 (6.5) | 40.4 (7.5) | 39.4 (6.4) | 0.507 |  | 42.1 (7.2) | 39.0 (6.1) | 0.076 |  | 39.7 (7.0) | 40.0 (5.4) | 0.816 |
| Conscientiousness | 48.1 (5.6) | 46.9 (5.5) | 48.9 (5.6) | 0.132 |  | 48.5 (5.1) | 47.9 (5.8) | 0.708 |  | 47.3 (6.0) | 49.2 (4.8) | 0.182 |
| Agreeableness | 43.3 (6.8) | 41.2 (6.3) | 44.7 (6.8) | 0.028 |  | 41.0 (6.3) | 44.0 (6.8) | 0.094 |  | 42.2 (6.6) | 45.2 (6.8) | 0.080 |
| Neuroticism | 28.8 (6.8) | 31.9 (7.0) | 26.6 (5.9) | 0.001 |  | 33.4 (8.0) | 27.1 (5.6) | <0.001 |  | 29.3 (7.1) | 26.2 (5.1) | 0.061 |

PPT, pain pressure threshold; BMI: body mass index. NRS: numerical rating scale. BPI: Brief Pain Inventory. PHQ-9, Patient Health Questionnaire-9; GAD-7, Generalized Anxiety Disorder Scale-7; PSQI, Pittsburgh Sleep Quality Index; NEO-FFI, Neuroticism Extraversion Openness Five-Factor Inventory. Differences between the depression, anxiety, and sleep disturbance and non- depression, anxiety, and sleep disturbance groups were examined by chi-square test for categorical variables and Student's t-test or Mann-Whitney test for continuous variables. Depression was defined using the PHQ-9 cutoff of 5 or higher; anxiety was defined using the GAD-7 cutoff of 5 or higher; sleep disturbance was defined as a total PSQI score of > 5.

**Supplemental Figure 1. Convergence checks**


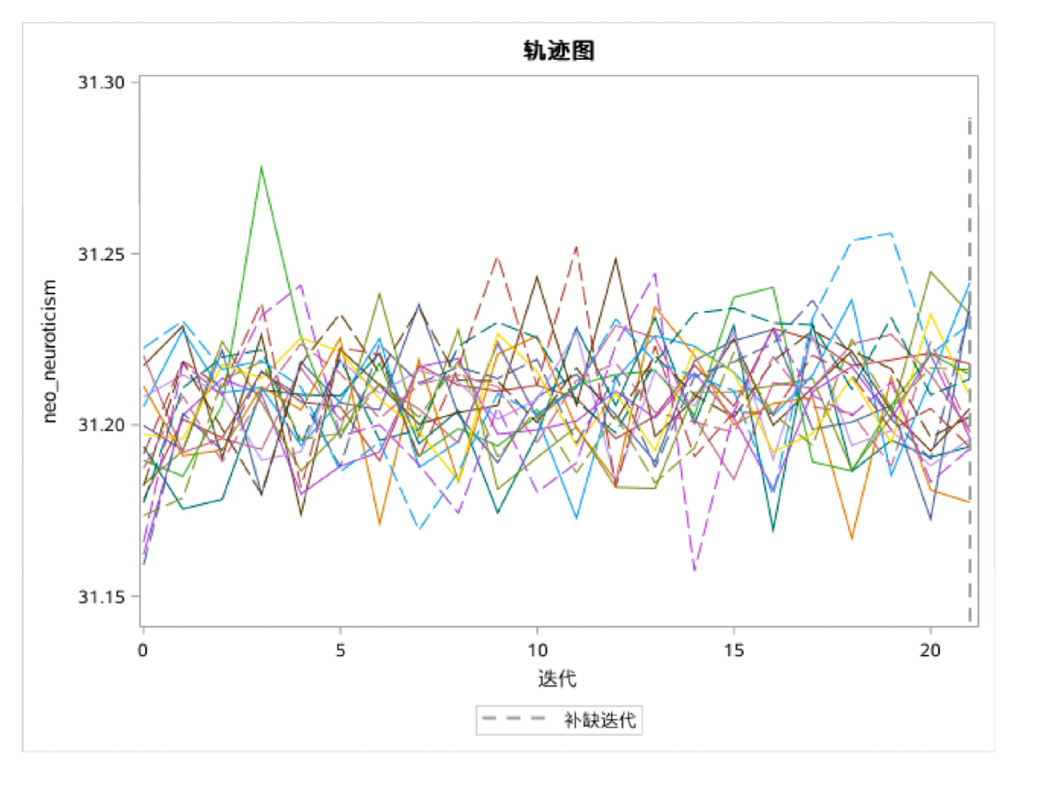

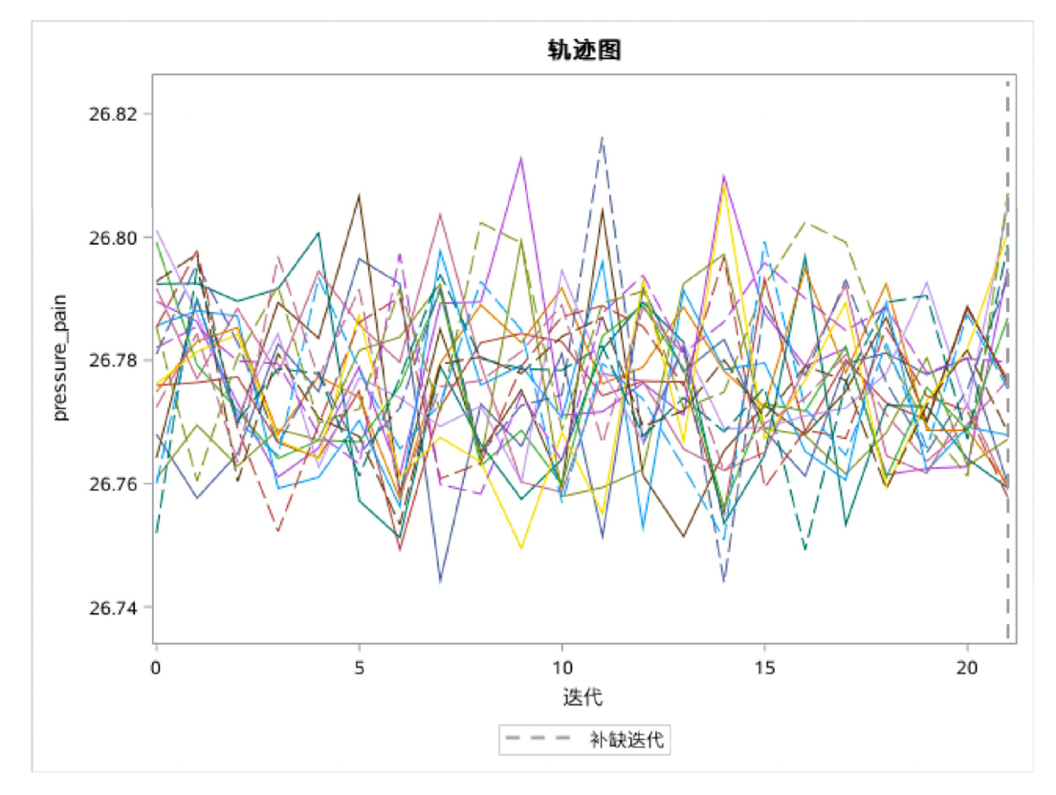


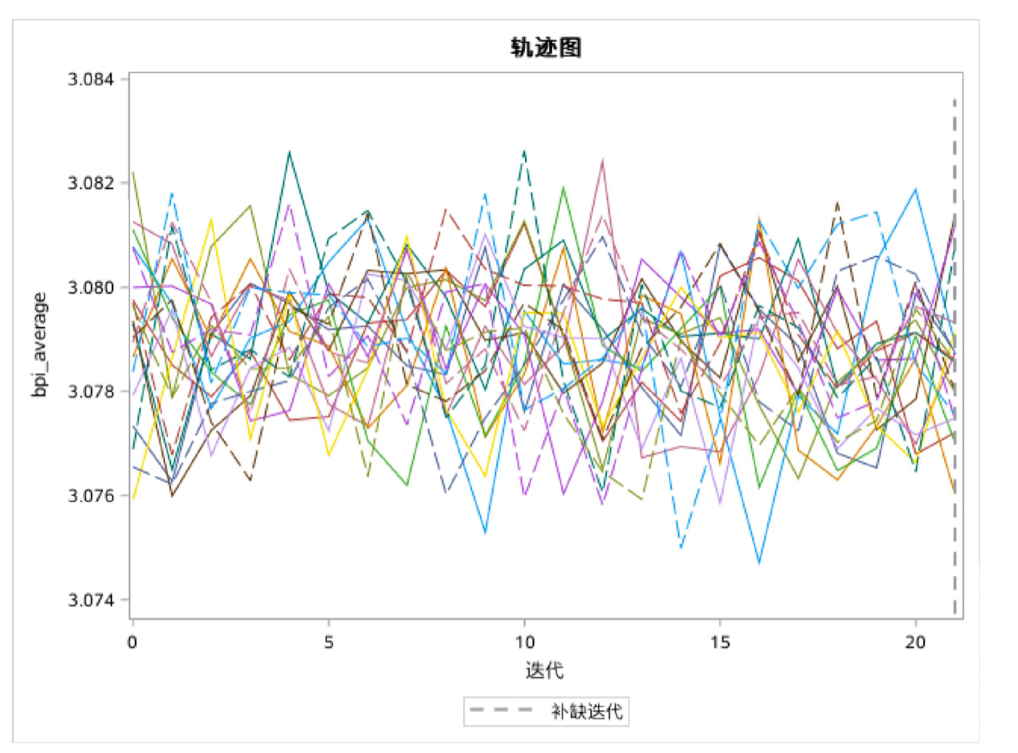

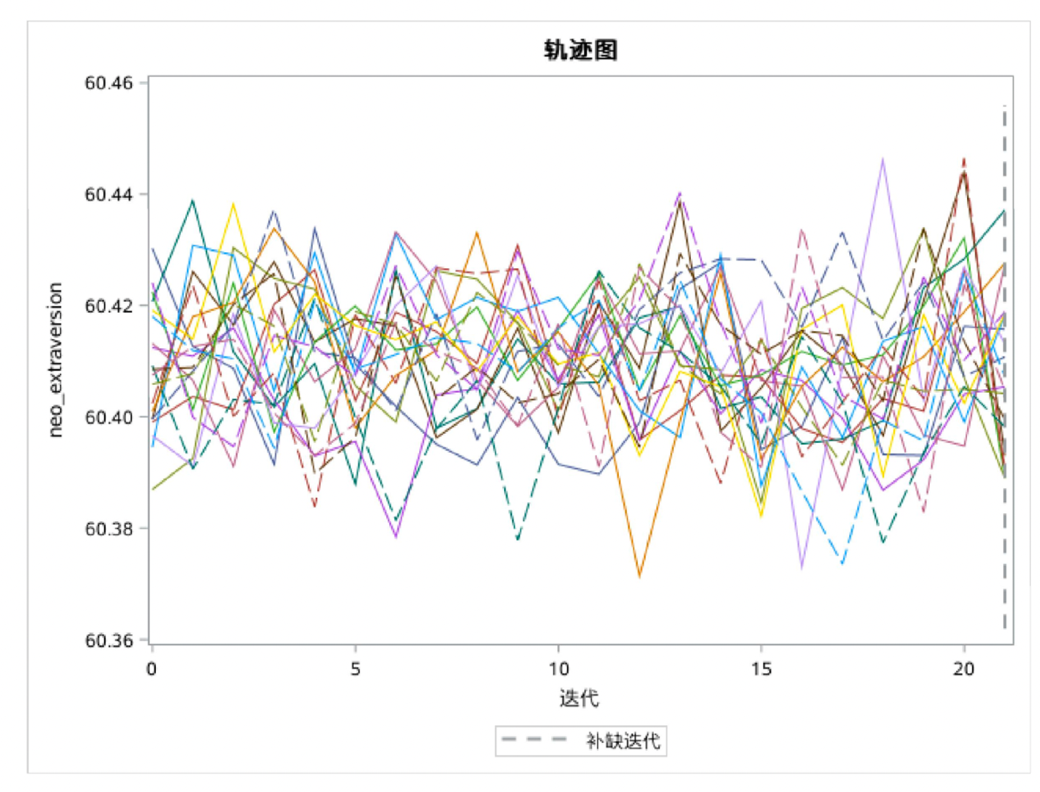


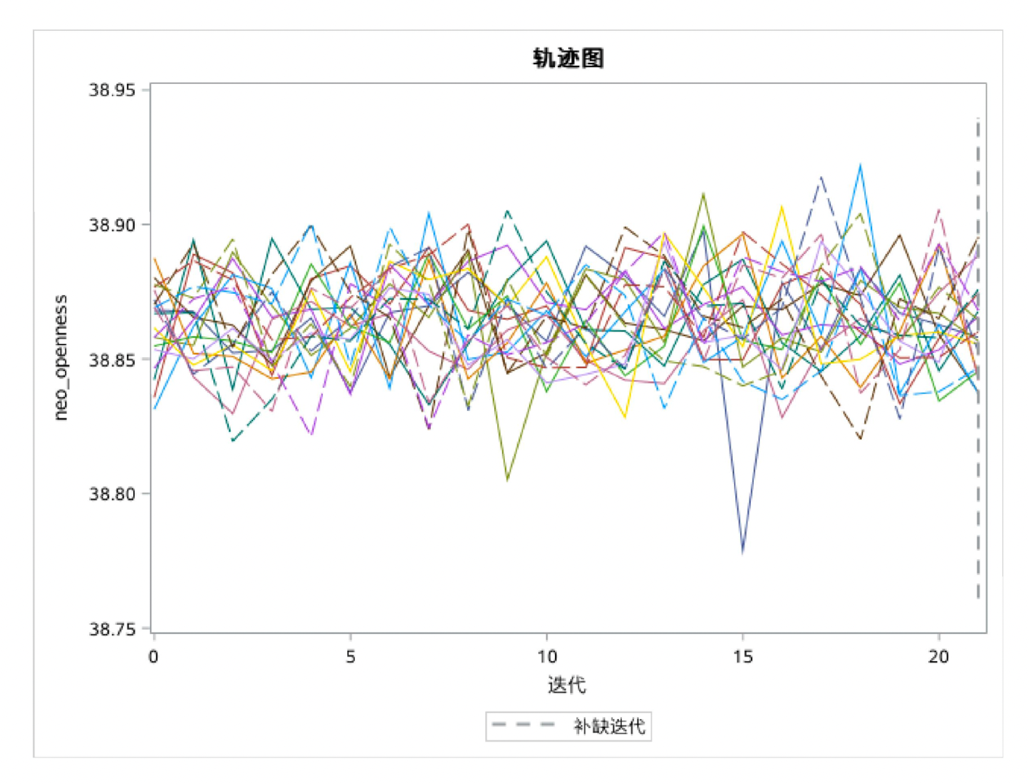

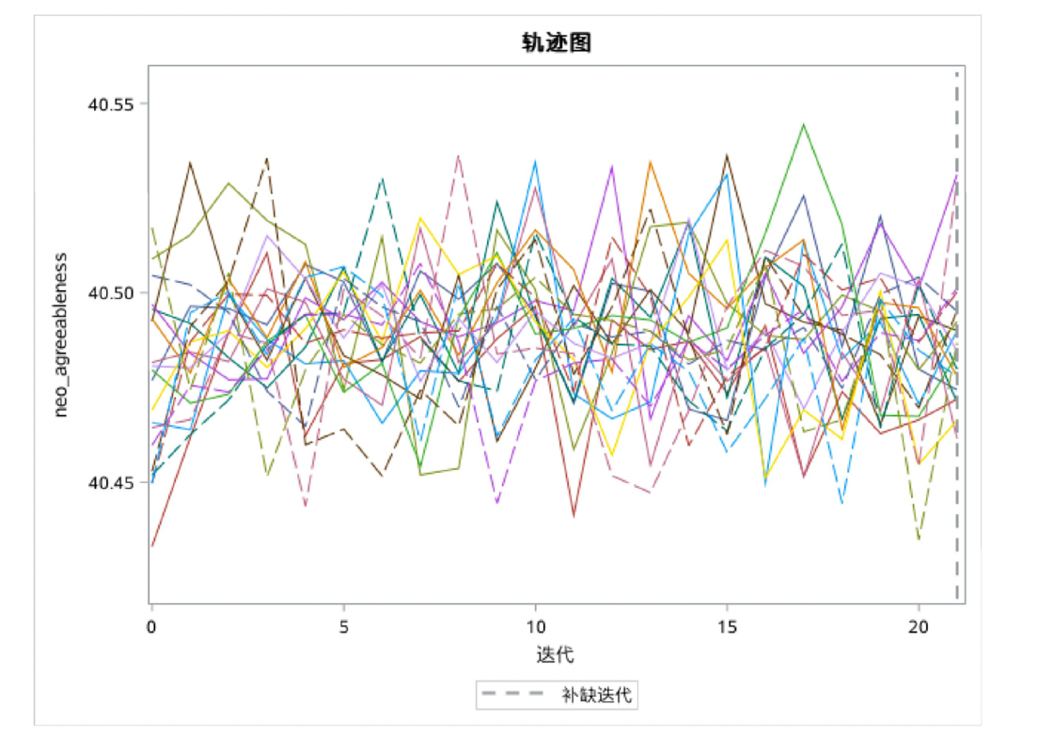


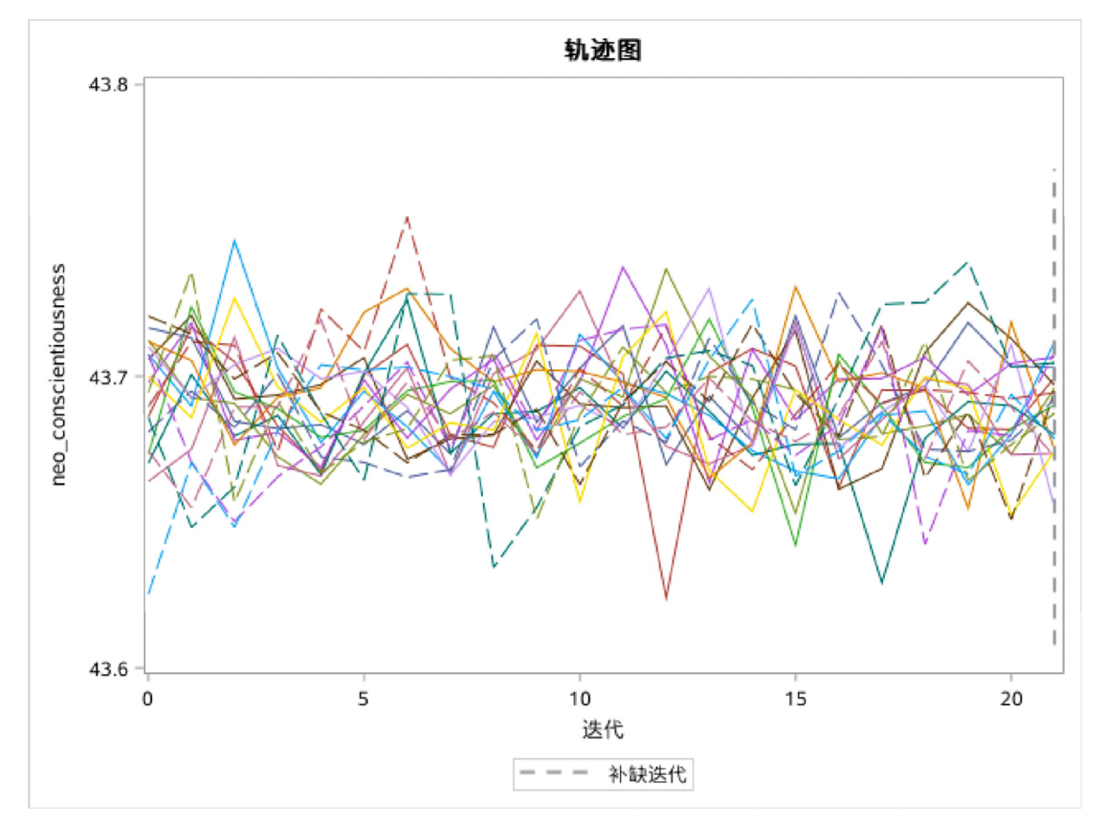

Supplement: Supplementary file 1 [file 561047%20Revised%20%20Supplementary%20material.docx]
